i

**IL-21 signaling promotes the establishment of KSHV infection in human tonsil lymphocytes  
by increasing early targeting of plasma cells**

Nedaa Alomari<sup>1</sup>, Farizeh Aalam<sup>1</sup>, Romina Nabiee<sup>1</sup>, Jesus Ramirez Castano<sup>1</sup> and Jennifer Totonchy<sup>‡</sup>

<sup>1</sup>Biomedical and Pharmaceutical Sciences, Chapman University, Irvine, CA USA

<sup>‡</sup>Corresponding Author

Jennifer Totonchy

Chapman University School of Pharmacy

9410 Jeronimo Road

Irvine, CA

Phone: 714-516-5438

Email: [totonchy@chapman.edu](mailto:totonchy@chapman.edu)

Short Title: IL-21 and KSHV infection of B cells

## 1 **Abstract**

2 Factors influencing Kaposi's sarcoma-associated herpesvirus (KSHV) transmission and the early  
3 stages of KSHV infection in the human immune system remain poorly characterized. KSHV is  
4 known to extensively manipulate the host immune system and the cytokine milieu, and cytokines  
5 are known to influence the progression of KSHV-associated diseases. Here, using our unique  
6 model of KSHV infection in tonsil lymphocytes, we investigate the influence of host cytokines  
7 on the establishment of KSHV infection in human B cells. Our data demonstrate that KSHV  
8 manipulates the host cytokine microenvironment during early infection and susceptibility is  
9 generally associated with downregulation of multiple cytokines. However, we show that IL-21  
10 signaling promotes KSHV infection by promoting both plasma cell numbers and increasing  
11 KSHV infection in plasma cells as early as 3 days post-infection. Our data reveal that this  
12 phenotype is dependent upon a specific milieu of T cells, that includes IL-21 producing Th17,  
13 Tc17 and CD8+ central memory T cells. These results suggest that IL-21 plays a significant role  
14 in the early stages of KSHV infection in the human immune system and that specific  
15 immunological states favor the initial establishment of KSHV infection by increasing infection in  
16 plasma cells.

## 17 **Introduction**

18 Kaposi's Sarcoma Herpesvirus (KSHV) is a lymphotropic gamma-herpesvirus, originally  
19 discovered as the causative agent of Kaposi Sarcoma (KS) [1]. KS is a highly proliferative tumor  
20 derived from lymphatic endothelial cells [2]. KSHV is also associated with the B cell  
21 lymphoproliferative diseases, Primary Effusion Lymphoma (PEL) and Multicentric Castleman's  
22 Disease (MCD) [3, 4], as well as the inflammatory disorder KSHV inflammatory cytokine

23 syndrome (KICS) [5]. KSHV is linked to 1% of all human tumors, and the World Health  
24 Organization (WHO) has classified it as class I carcinogen [6, 7]. KSHV infection is asymptomatic  
25 in most healthy individuals, and KSHV-associated malignancies arise primarily in  
26 immunocompromised patients. Indeed, KS remains one of the most common cancers in people  
27 living with HIV/AIDS [8].

28 The geographical distribution of KSHV is not ubiquitous. KSHV infection is endemic in sub-  
29 Saharan Africa and in the Mediterranean basin. KSHV prevalence is also high in subpopulations  
30 in other parts of the world such as men who have sex with men (MSM). Saliva is the only secretion  
31 where KSHV DNA is commonly detected [9], and, based on this, person-to-person transmission  
32 of KSHV is thought to occur via saliva. The oral lymphoid tissues are rich in KSHV target cell  
33 types including lymphatic endothelial cells and B cells, and are therefore a likely site for the initial  
34 establishment of KSHV infection in a new human host. However, the exact mechanisms for KSHV  
35 transmission and how environmental, behavioral and host factors influence transmission and early  
36 infection events remain to be definitively established. This gap in our understanding dramatically  
37 affects our ability to find efficient strategies to decrease the transmission or influence host-level  
38 susceptibility to KSHV infection. We previously analyzed susceptibility to KSHV infection in a  
39 cohort of human tonsil samples with diverse race, sex and age distributions and found that these  
40 samples displayed high variability in susceptibility that could not be linked to demographic factors  
41 [10]. Our ongoing research seeks to identify, and mechanistically characterize, host-level  
42 susceptibility factors that influence this variable susceptibility. It is important to note that, in this  
43 context, it is the highly susceptible and highly refractory “outlier” specimens that may ultimately  
44 prove the most informative in identifying these critical susceptibility factors.

45 Cytokine dysregulation is strongly linked to the pathogenesis of KSHV-associated  
46 lymphoproliferations [11]. However, their contribution to the early stages of KSHV infection and  
47 whether the cytokine milieu in the oral cavity contributes to host-level susceptibility to KSHV  
48 infection is unclear. IL-21 is a pleiotropic cytokine that has diverse effects on B cell, T cell,  
49 macrophage, monocyte, and dendritic cell biology. It is produced mainly by natural killer T (NKT)  
50 cells and CD4<sup>+</sup> T cells, including follicular helper (T<sub>fh</sub>) cells [12]. The IL-21 receptor is expressed  
51 by several immune cells, including B and T cells and is comprised of a unique IL-21R subunit and  
52 the common cytokine receptor  $\gamma$  chain (CD132), which is also part of the receptor for IL-2, IL-4,  
53 IL-7, IL-9, and IL-15 [13]. IL-21 plays a critical role in B cell activation and expansion [14], as  
54 well as B cell differentiation to immunoglobulin (Ig)-secreting plasma cells. The regulation of  
55 maturation of B cells into plasma cell is driven by the several transcription factors including  
56 Blimp1 and Bcl6 [15], which can both be induced by IL-21 signaling, indicating that IL-21 is an  
57 important regulator of plasma cell differentiation [16, 17]. IL-21 has been studied in the  
58 pathogenesis of chronic lymphocytic choriomeningitis virus (LCMV) infection, influenza virus,  
59 and, most relevant to this study, IL-21 plays an important role in the early establishment of murine  
60 gammaherpesvirus 68 (MHV68) infection in mice [18-20]. Moreover, IL-21 induces  
61 differentiation of B-lymphoblastoid cell lines into late plasmablast/early plasma cell phenotypes,  
62 and regulates the expression of many latent proteins in EBV<sup>+</sup> Burkitt lymphoma cell lines [21, 22].  
63 Although IL-21 is canonically thought to act primarily in germinal centers, it is detected in  
64 interfollicular areas in MCD patients [23]. There are few studies, to date, examining the  
65 contribution of IL-21 to KSHV infection and KSHV-associated disease.  
66 In this study, we use our well-established *ex vivo* tonsil lymphocyte infection model to explore  
67 whether KSHV alters cytokine secretion early in infection and whether cytokine levels have an

68 effect on the establishment of KSHV infection. As with our previous studies exploring factors  
69 influencing susceptibility of tonsil samples to KSHV infection, we concentrated data collection on  
70 3 dpi, as the earliest timepoint in which infection can be reliably detected, in order to maximize  
71 our ability to identify intrinsic susceptibility factors and minimize the contribution of cell culture  
72 artifacts that accumulate over time in the cultures. We identify IL-21 as a factor that specifically  
73 influences KSHV infection in plasma cells, which we previously characterized as a highly targeted  
74 cell type in early infection [10]. We show that supplementation of tonsil lymphocyte cultures with  
75 IL-21 enhances total infection while IL-21 neutralization decreases total KSHV infection at early  
76 times post-infection. We demonstrate that IL-21 signaling and KSHV infection synergistically  
77 increase plasma cell frequencies in the cultures, there are increased levels of KSHV-infected  
78 plasma cells in the presence of IL-21, and that these effects are correlated with total KSHV  
79 infection in all B cell subsets at 3 dpi. We further explore the immunological mechanisms of this  
80 IL-21 effect by establishing which B cell types are responding IL-21, and what T cell subsets are  
81 producing IL-21 in our model.

82 These results identify IL-21 signaling as a factor that influences the establishment of KSHV  
83 infection in B lymphocytes via manipulation of plasma cells. Together with our previous work,  
84 this study underscores the importance of plasma cell biology in the initial establishment of KSHV  
85 infection in the oral lymphoid tissues. Moreover, we identify a combination of T cells, including  
86 particular IL-21 secreting T cell subsets, that correlate with KSHV-mediated manipulation of  
87 plasma cells. Thus this T cell signature may be indicative of an inflammatory state that favors  
88 KSHV transmission.

## 89 **Results**

## 90 **Host cytokines influence the establishment of KSHV infection B lymphocytes**

91 Despite the critical interplay between KSHV and host cytokine signaling, little is known about  
92 whether cytokines influence host susceptibility to KSHV infection. In fact, the roles of  
93 proinflammatory cytokines during KSHV infection have been studied mostly in naturally-infected  
94 human B cell lines derived from PEL [24, 25]. In order to examine whether cytokines alter the  
95 early stages of KSHV infection in the tonsil, we quantitated the levels of 13 cytokines in the  
96 supernatants of Mock and KSHV-infected tonsil lymphocyte cultures at 3 days post-infection  
97 using a bead-based multiplex immunoassay. This dataset includes 33 independent infections using  
98 24 unique tonsil specimens. IL-6, IFN $\gamma$ , TNF $\alpha$  and IL-22 were the most prevalent cytokines in our  
99 cultures based on the median values overall (Fig 1A, panel order). IL-6 was the only cytokine  
100 significantly induced in KSHV-infected cultures compared to Mock cultures (Fig 1A) and the  
101 magnitude of IL-6 induction by KSHV infection is far greater than the effect of infection on any  
102 other cytokine (Fig 1B). This result is consistent with our previous results in cultures containing  
103 only naïve B lymphocytes [26]. Our data also reveals statistically significant reductions in IL-5  
104 and IL-4 concentrations in KSHV-infected cultures compared to Mock cultures (Fig 1A), but these  
105 changes are very small compared to those seen with IL-6 (Fig 1B). Interestingly, IFN $\gamma$   
106 concentrations were highly affected by KSHV infection, but there were sample-specific  
107 differences in whether this effect was positive or negative (Fig 1B).

108 In order to determine whether cytokines affect the establishment of KSHV infection, we examined  
109 whether the concentration of cytokines in the supernatants of KSHV-infected cultures is correlated  
110 with the level of infection in B lymphocytes (based on GFP reporter expression) in the same culture  
111 by flow cytometry analysis (Fig 1C & D). On a per-sample level, many individual cytokines  
112 (notably IL-6 and IFN $\gamma$ ) were induced or repressed independent of susceptibility (Fig 1C, red

113 diamonds and right y-axis scale). However, many of the most susceptible samples included in this  
114 dataset, display lower levels of multiple cytokines in KSHV-infected cultures vs. Mock cultures  
115 (Fig 1C, far left samples), indicating that the ability of KSHV to suppress cytokine secretion may  
116 influence the early stages of infection. Consistent with this, pairwise comparisons between overall  
117 GFP level in B lymphocytes and the level of each cytokine in the KSHV-infected cultures revealed  
118 universally negative correlations between overall KSHV infection and cytokine levels with lower  
119 cytokine levels observed in more susceptible samples. These negative correlations were  
120 statistically significant for IL-2, IL-9, IL-10, TNF $\alpha$ , IL-4 and IL-22 (Fig 1D). Since plasma cells  
121 were identified as a highly targeted cell type in our previous study [10], we examined the  
122 correlations between cytokine levels in KSHV-infected cultures and infection in the CD138+  
123 plasma cell subset. This analysis revealed negative correlations similar to those seen with overall  
124 infection with IL-13, IL-9, IFN $\gamma$ , TNF $\alpha$  and IL-22 levels showing statistically significant negative  
125 correlations with plasma cell infection. However, in this analysis IL-21 levels showed a significant  
126 positive correlation with plasma cell infection (Fig 1E). Taken together, these data  
127 demonstrate that (1) KSHV infection influences the production of multiple cytokines in our *ex vivo*  
128 infection model, (2) lower cytokine levels and/or repression of cytokines during infection are  
129 generally associated with higher susceptibility to KSHV infection, (3) several individual cytokines  
130 show significant negative associations with susceptibility to KSHV infection and (4) IL-21 is  
131 positively correlated with KSHV infection of plasma cells. Overall, these data suggest that distinct  
132 inflammatory responses in each tonsil specimen contribute to variable susceptibility to KSHV  
133 infection.

134 **IL-21 supplementation increases KSHV infection in tonsil B lymphocytes**

135 Because IL-21 production was positively correlated with plasma cell infection in our initial dataset  
136 (Fig 1E), we wanted to examine the impact of manipulating IL-21 levels on the establishment of  
137 KSHV infection. To do this, we performed Mock infection or KSHV infection in 12 unique tonsil  
138 samples and supplemented the resulting cultures with varying concentrations of recombinant IL-  
139 21. At 3 dpi, we analyzed these cultures for GFP+ B lymphocytes by flow cytometry to assess the  
140 magnitude of KSHV infection (Fig 2A & B). Although the specimens included in this data set had  
141 high variability in their baseline susceptibility, we can see increased infection in response to IL-  
142 21 treatment, and the effect seems to be particularly strong in the more susceptible samples (Fig  
143 2A). Normalization of the data to each specimen's untreated control reveals that at 10/12 samples  
144 show increased infection upon treatment with 100pg/ml of IL-21. Importantly, most of these  
145 concentrations were higher than what was observed by 3 dpi in our initial dataset quantitating  
146 native cytokine secretion in our culture system (Fig 1A), which may explain why we didn't observe  
147 an association of IL-21 secretion with overall infection at that timepoint (Fig 1D). We then  
148 repeated these supplementation experiments with only the 100pg/ml dose of recombinant IL-21 in  
149 an additional 12 tonsil specimens and examined both overall infection and subset-specific  
150 responses in these cultures at 3 dpi using our B cell immunophenotyping panel (Table 1 and  
151 Supplemental Fig 1A). Similar to the initial dataset, this analysis shows increased infection in  
152 response to recombinant IL-21 in the majority of tonsils, and the difference in GFP+ B  
153 lymphocytes was statistically significant in IL-21 treatment compared to control ( $p=0.02$ ,  $F=6.4$ )  
154 (Fig 2C). This increase in infection was not associated with alterations in the frequency of viable  
155 B cells in the cultures (Supplemental Table 1B).

156 **IL-21 increases plasma cell frequency and susceptibility in primary human tonsil B**  
157 **lymphocytes**



158 To examine whether IL-21 treatment altered the B cell subset-specific distribution of KSHV  
159 infection in these experiments, we quantitated the percent of each B cell subset that was GFP+ to  
160 determine the within-subsets distribution of KSHV infection in control or IL-21 treated cultures.  
161 One-way repeated measures ANOVA analysis indicates that IL-21 supplementation did not  
162 significantly affect KSHV infection for most subsets (Supplemental Table 1A). However, we  
163 observed a significant increase in plasma cell targeting with IL-21 treatment ( $p=0.02$ ,  $F=6.6$ ) and  
164 notable, but non-significant, increases in the infection of germinal center and plasmablast subsets  
165 (Fig 2D). We next examined whether IL-21 supplementation was associated with alterations in B  
166 cell frequencies in either Mock or KSHV-infected cultures. Two-way repeated measures ANOVA  
167 analysis (Supplemental Table 1B) revealed a highly significant increase in total plasma cell  
168 frequency associated with both IL-21 treatment and KSHV infection with a significant interaction  
169 of the two variables (Fig 2E). Neither infection nor treatment had a significant effect on germinal  
170 center cell frequencies, but there was a significant main effect of KSHV infection on frequencies  
171 of plasmablasts in these cultures ( $p=0.03$ ,  $F=6$ ). Post hoc paired T tests revealed significant  
172 differences with IL-21 treatment on total plasma cells ( $p=0.0002$ ) for the KSHV-infected  
173 conditions only, and in IL-21 treated conditions there was a significant difference between Mock  
174 and KSHV cultures for total plasma cells ( $p=0.0003$ ). In order to determine whether the increase  
175 in total plasma cell frequency and/or increased infection of plasma cells was directly correlated  
176 with the effect of IL-21 on total KSHV infection, we performed linear model regressions and  
177 analyzed the results using Pearson's method (Fig 2F). These results reveal a significant linear  
178 correlation between total GFP and plasma cell frequency ( $r=0.7$ ,  $p=0.007$ ) and a weaker, but still  
179 significant, correlation between total GFP and the frequency of GFP+ cells within the plasma cell  
180 subset ( $r=0.56$ ,  $p=0.04$ ). Taken together this data shows that IL-21 treatment promotes the

181 establishment of KSHV infection in human tonsil lymphocytes, and that this increased infection  
182 is correlated with both increased plasma cell frequencies and increased plasma cell infection at 3  
183 dpi.

#### 184 **Neutralization of IL-21 inhibits KSHV infection in primary tonsil B lymphocytes**

185 We next wanted to determine whether neutralization of the natively-secreted IL-21 in our tonsil  
186 lymphocyte cultures would affect the establishment of KSHV infection. To do this, we performed  
187 infections with Mock or KSHV-infection in 11 unique tonsil specimens, included varying  
188 concentrations of an IL-21 neutralizing antibody in the resulting cultures, and assessed the  
189 magnitude and distribution of KSHV infection at 3 dpi by flow cytometry. These results reveal  
190 decreased KSHV infection in the presence of IL-21 neutralizing antibodies (Fig 3A). One-way  
191 repeated measures ANOVA revealed a significant effect of IL-21 neutralization on GFP+ cells in  
192 KSHV infected cultures ( $p=0.00001$ ,  $F=9.4$ ) and post-hoc Dunnett test revealed significance at the  
193  $100\mu\text{g/ml}$  dose ( $p=0.03$ ). When each sample was normalized to its untreated control, we observed  
194 that 9/11 samples had decreased infection in the presence of  $100\mu\text{g/ml}$  IL-21 neutralizing antibody  
195 and this increased to 10/11 samples at higher antibody doses (Fig 3B).

196 Interestingly, when we examined whether this decrease in KSHV infection was associated with  
197 alterations in infection of any particular B cell subsets by one-way repeated measures ANOVA  
198 (Supplemental Table 2A), we only observed a significant decrease in GFP+ transitional B cells  
199 ( $p=0.01$ ,  $F=4.0$ ). However, there are non-significant trends showing lower frequencies of infection  
200 within plasmablast and CD20+ plasma cell subsets in most samples. (Fig 3C). Moreover, there  
201 were no KSHV-specific effects of IL-21 neutralization on the total frequency of any B cell subsets  
202 in these experiments via two-way repeated measures ANOVA (Supplemental Table 2B). However,

203 total and CD20+ plasma cell frequencies were significantly reduced at the 200 $\mu$ g dose only in  
204 mock cultures (Fig 3D). The observation that the effect of IL-21 neutralization on plasma cell  
205 frequencies is restricted to mock-infected cultures is interesting in the context of our IL-21  
206 supplementation data where we observed significant main effects of both IL-21 and KSHV  
207 infection on plasma cell frequencies as well as a significant interaction between the two factors  
208 (Fig 2E & Supplemental Table 1B). The two data sets taken together support several interesting  
209 conclusions: (1) IL-21 affects plasma cell frequencies independent of KSHV infection; evidenced  
210 by opposite significant effects of IL-21 supplementation and neutralization in mock cultures, (2)  
211 KSHV infection affects plasma cell frequencies independent of IL-21 signaling; evidenced by  
212 significant main effect of infection in supplemented cultures and a lack of inhibition in KSHV-  
213 infected neutralized cultures, and (3) IL-21 and KSHV can synergistically affect plasma cell  
214 frequencies; evidenced by the significant interaction effect and the significant increase in plasma  
215 cell frequencies in KSHV-infected cultures that are supplemented with IL-21.

216 We believe it is the sample-specific variability in responses to IL-21 neutralization that resulted in  
217 non-significant effects when the data was parsed to infection within subsets. This variability is not  
218 surprising given that magnitude of any effect of neutralization is dependent upon the quantity of  
219 IL-21 signaling in the particular culture, which is variable depending upon the sample (Fig. 1A)  
220 We hypothesized that if IL-21 signaling is affecting overall infection by contributing to  
221 differentiation of KSHV-infected cells, subsets whose differentiation is important to the  
222 establishment of infection would accumulate within the GFP+ population with IL-21  
223 neutralization, and this accumulation would correlate with decreased overall levels of infection in  
224 response to neutralization. Conversely, subsets whose targeting promotes overall infection in an  
225 IL-21 dependent manner would be less represented within the GFP+ population in samples where

226 neutralization was effective at reducing total GFP+ cells. Thus, we calculated the change in total  
227 GFP+ B cells in IL-21 neutralized cultures compared to matched control cultures (neutralized-  
228 control; effect of neutralization on total infection) and compared this to the change (neutralized-  
229 control; effect of neutralization on frequency of subset within GFP+) in the contribution of each  
230 subset to infection (between subsets frequency of GFP calculated as GFP+ within subset \*  
231 frequency of subset within viable CD19+), and performed correlation analysis using Pearson's  
232 method. This analysis reveals that decreased overall infection with IL-21 neutralization was  
233 significantly correlated with a decreased contribution of plasma cells ( $r=0.6$ ,  $p=0.0002$ ), CD20+  
234 plasma cells ( $r=0.6$ ,  $p=0.0002$ ), and transitional B cells ( $r=0.5$ ,  $p=0.003$ ) and an increased  
235 proportion of infected germinal center cells ( $r=-0.4$ ,  $p=0.02$ ) (Fig 3E). As expected, based on the  
236 variable per-sample responses we observed for neutralization (Fig 3A&B), these correlations were  
237 driven more by sample-specific differences (indicated by point color) than neutralizing antibody  
238 dose (indicated by point shape). This data could indicate that IL-21 signaling increases the overall  
239 establishment of KSHV infection in tonsil lymphocytes by driving differentiation of germinal  
240 center cells into transitional and CD20+ plasma cells. Our previous studies demonstrated that  
241 plasma cells display a mixture of lytic and latent KSHV infection [10]. Therefore, we wanted to  
242 determine whether the increase in overall KSHV infection with IL-21 treatment and decrease in  
243 infection with IL-21 neutralization is due to IL-21-mediated alterations in KSHV lytic reactivation.  
244 To examine this, we performed RT-PCR for LANA (latent) and K8.1 (lytic) on total RNA from  
245 untreated, IL-21 supplemented or IL-21 neutralizing antibody treated, KSHV-infected cultures  
246 from 8 unique tonsil specimens. GAPDH was used as a housekeeping gene and normalizing factor  
247 for the viral gene expression data. This data is consistent with our previous data showing a mix of  
248 lytic and latent transcripts in infected lymphocytes [10]. These data reveal no significant influence

249 of either supplementation or neutralization on lytic gene expression (Fig 3F). In the majority of  
250 samples K8.1 expression remained unchanged or changes were also reflected in LANA transcripts,  
251 indicating higher overall infection rather than increased lytic activity (Fig 3G).

252 **Baseline frequencies of IL21 receptor expression in B cell subsets correlate with**  
253 **susceptibility to KSHV infection**

254 Our data presented thus far demonstrates that IL-21 signaling has a positive effect on the overall  
255 establishment of KSHV infection (Fig 2C and 3B) and this increase in overall infection is related  
256 to both the frequency of plasma cells (Fig 2E&F and 3D), and the establishment of infection in  
257 plasma cells (Fig 2D&F and 3E). Moreover, our data suggests that the increase in plasma cell  
258 numbers and targeting may be due to differentiation of new plasma cells via a process that requires  
259 IL-21 signaling to germinal center B cells (Fig 3E). To further address the early stages of the IL-  
260 21 response during infection, we examined expression of the IL21 receptor in primary human  
261 tonsil B lymphocytes at baseline (day 0) in each tonsil specimen. We observed that IL-21 receptor  
262 expression is rare on B cells in tonsil at less than 3% of total viable B cells in most samples (Fig  
263 4A). The distribution of IL-21 receptor positive cells among B cell sub-populations is broad and  
264 varies substantially between samples, but IL-21 receptor-expressing B cells are most likely to have  
265 an MZ-like or plasmablast immunophenotype (Fig 4B) and on a per-sample basis, either  
266 plasmablast or MZ-like subsets dominated the IL-21R positive cells in most tonsil samples (Fig  
267 4C). When we examined subset-specific levels of IL-21R via the geometric mean fluorescence  
268 intensity of the IL-21R staining within IL-21R+ cells in each subset, we observed that naïve, MZ-  
269 like and memory subsets (classical memory and double negative) expressed the highest levels of  
270 IL-21R and thus may be most responsive to IL-21 signaling (Fig 4D).

271 In order to determine whether IL-21 receptor expression prior to infection influenced the  
272 establishment of KSHV infection, we aggregated the untreated conditions from both the  
273 supplementation and the neutralization experiments and examined correlations between baseline  
274 IL21R distribution and KSHV infection based on overall GFP (Supplemental Table 3A). This  
275 analysis revealed that the proportion of plasmablasts within IL21R+ B cells is significantly  
276 correlated with overall susceptibility to KSHV infection in the absence of any IL-21 treatment  
277 ( $r=0.81$ ,  $p=0.0007$ ) (Fig 4E). However, in experiments where we supplemented cultures with IL-  
278 21, the IL-21-mediated increase in overall KSHV infection at 3 dpi (Fig 2C) is correlated with the  
279 baseline frequency of IL-21 receptor expression on naïve B cells ( $r=0.82$ ,  $p=0.01$ ) (Fig 4F and  
280 Supplemental Table 3B). However, there were no significant correlations between the MFI of IL-  
281 21R at baseline and total GFP at 3 dpi for any subset (Supplemental Table 4D). These results  
282 suggest that IL-21+ plasmablasts are important for susceptibility to KSHV in the absence of high  
283 levels of IL-21 at early timepoints in untreated cultures while naïve B cells contribute to the effect  
284 of IL-21 supplementation.

285 Interestingly, there was no positive correlation seen between baseline IL-21R expression and the  
286 response of plasma cell frequencies to IL-21 (Supplemental Table 3C), suggesting that the plasma  
287 cell response to IL-21 at 3 dpi in KSHV infected cultures may be a product of IL-21 receptor up-  
288 regulation in response to infection instead of intrinsic baseline levels of IL-21 on plasma cells or  
289 plasma cell precursors in our tonsil lymphocyte cultures. Indeed, modulation of IL-21 receptor  
290 expression by KSHV infection is one possible mechanism for the synergistic promotion of plasma  
291 cell numbers we observe with both IL-21 treatment and infection (Fig 2D).

292 **IL-21R+ plasmablasts increase in response to KSHV infection and IL-21R+ Plasma cells**  
293 **increase in response to IL-21 only in KSHV+ cultures.**

294 In order to examine this hypothesis, we analyzed IL-21R expression on B cell subsets at 3 dpi in  
295 our culture system with or without IL-21 supplementation to determine whether KSHV and/or IL-  
296 21 can modulate the response to IL-21 during infection. There were no statistically significant  
297 differences in either the frequency (Fig 5A) or fluorescence intensity (Fig 5B) of IL-21R with  
298 KSHV infection or IL-21 supplementation. When we examined IL-21R expression on KSHV-  
299 infected (GFP+) cells vs GFP- cells in the same culture, we observed non-significant trends in the  
300 data showing that GFP+ cells were more likely to be IL-21R+ (Fig 5C) and had higher MFI for  
301 IL-21R expression (Fig 5D) compared to GFP- cells. Neither of these effects was altered by IL-21  
302 stimulation. When we examined the distribution of B cell subsets within IL-21R+ B cells, the  
303 majority of effects on IL-21R expression at 3 dpi were present in both Mock and KSHV-infected  
304 cultures, indicating they are a product of the culture system and not driven by KSHV  
305 (Supplemental Tables 4A&B). However, the proportion of plasmablasts within IL21R+ cells was  
306 significantly increased comparing Mock to KSHV-infected cultures without IL-21 treatment  
307 ( $p=0.03$ ) and this difference was further increased with the combination of KSHV infection and  
308 IL-21 treatment (Fig 5E and Supplemental Table 4B). Comparing untreated and IL-21 treated  
309 cultures within infection conditions revealed a significant effect of IL-21 treatment on IL-21+  
310 plasma cells only in the KSHV-infected cultures (Fig 5E and Supplemental Table 4C). However,  
311 there was no significant effect of KSHV infection or IL-21 treatment on the fluorescence intensity  
312 of IL-21R for any subset (Supplemental Table 4D). Interestingly, there was a significant  
313 correlation between the frequency of plasmablasts within IL-21+ and overall infection at 3dpi (Fig  
314 5F, left), which was driven by samples where large increases in GFP in response to IL-21 treatment

315 corresponded to large increases in IL-21R<sup>+</sup> plasmablasts (Fig 5F, right). This result is particularly  
316 interesting taken together with the correlation between baseline plasmablast frequencies and  
317 overall infection at 3 dpi in untreated conditions.

318 These results may indicate that infection and IL-21 treatment is affecting IL21R expression on  
319 existing plasmablasts and plasma cells, or that KSHV and IL-21 synergistically drive  
320 differentiation of IL-21R<sup>+</sup> cells to plasmablast and plasma cell phenotypes. Our observation that  
321 IL-21R<sup>+</sup> naïve B cells at day 0 are correlated with the response of KSHV infection to IL-21  
322 treatment (Fig 4F) is one indication that differentiation may be playing a role in the IL-21 response.  
323 However, our data do not exclude the possibility that a combination of both receptor modulation  
324 and differentiation are contributing to the observed 3 dpi phenotypes in the presence of both IL-  
325 21 and KSHV infection.

### 326 **Characterization of T cell subsets producing IL-21 in primary human tonsil B lymphocytes**

327 We next wanted to determine the source of native IL-21 secretion in our culture system, and  
328 determine whether the production of IL-21 is affected by KSHV infection. To accomplish this, we  
329 utilized an additional immunophenotyping panel for T cell subsets (Table 2 and Supplemental Fig  
330 1B), and performed intracellular cytokine staining (ICCS) on unstimulated T cells at 3 dpi to  
331 identify T cell subsets that are producing IL-21 (Supplemental Fig 1C) in Mock and KSHV-  
332 infected cultures from 14 unique tonsil samples. This data shows that IL-21 secretion in T cells is  
333 highly variable between tonsil lymphocyte cultures (range=1.4-24.7%, mean=10.6, median=10.55,  
334 standard deviation=6.9), but is not significantly affected by KSHV infection (Fig 6A). More of the  
335 IL-21<sup>+</sup> cells were CD4<sup>+</sup> T cells vs. CD8<sup>+</sup> T cells and this distribution was also not affected by  
336 KSHV infection (Fig 6B). We next utilized a metric called integrated MFI (iMFI) [27] to examine



337 the contribution of T cell subsets to IL-21 secretion. This value is calculated by multiplying the  
338 mean fluorescence intensity of IL-21 in each T cell subset by the subset's frequency within total  
339 T cells. Thus, iMFI integrates the amount of IL-21 being secreted by a subset with the frequency  
340 of that subset; more correctly quantitating the contribution of low frequency subsets that are high  
341 IL-21 producers. Unlike the frequency of IL-21+ T cells, the iMFI of IL-21 within CD4+ and  
342 CD8+ T cells displayed some overlap (Fig 6C), indicating that, although they are low frequency,  
343 CD8+ T cells can be high producers of IL-21. Indeed, there were two samples in our analysis  
344 where, based on iMFI, CD4+ and CD8+ T cells were contributing equally to total IL-21 secretion  
345 (Fig 6D, red box). When we examined the subset-level distribution of IL-21 secretion within T  
346 cells, we observed that within CD4+ cells CD45RO+, central memory, Tfh and RoR $\gamma$ T+ cells  
347 displayed the highest frequency of IL-21 positive cells. Among CD8+ T cells, CD45RA+, stem  
348 cell memory, central memory and RoR $\gamma$ T+ cells had the highest frequency of IL-21 positive cells  
349 (Fig 6E). When we examined whether KSHV infection altered the frequency of IL-21+ T cell  
350 subsets, we found that the frequency of IL-21+ CD4+ CD45RA+, CD4+ RoR $\gamma$ T+ and CD8+  
351 central memory subsets was significantly decreased in KSHV-infected cultures vs. Mock cultures.  
352 Importantly, KSHV infection did not significantly change the overall levels and subset distribution  
353 of T cells within these cultures, indicating these are biological changes within T cell subsets and  
354 not due to changes in the T cell population during infection (Supplemental Fig 2A). When we  
355 performed the iMFI calculation on the subset level we observed that, as expected based on their  
356 established function, CD4+ Tfh had an increased contribution to IL-21 secretion relative to their  
357 frequency. CD45RO+ T cells contributed more to IL-21 in CD4+ T cells whereas CD45RA+ T  
358 cells contributed more to IL-21 secretion in the CD8+ population. Interestingly, among the CD8+  
359 T cell subsets, RoR $\gamma$ T+ and central memory subsets showed increased contribution to IL-21

360 secretion relative to their frequency indicating that these cells are high IL-21 producers (Fig 6F).  
 361 Finally, KSHV infection significantly decreased the iMFI of CD4<sup>+</sup> CD45RA<sup>+</sup> and CD4<sup>+</sup> RoRγT<sup>+</sup>  
 362 T cell subsets, which is likely related to their significantly decreased frequency (Fig 6E) rather  
 363 than an effect on the level of IL-21 secretion from the subset.

| <b>Table 1: Lineage definitions for lymphocyte subsets used in the study</b> |                                                                                                                                                                                                 |
|------------------------------------------------------------------------------|-------------------------------------------------------------------------------------------------------------------------------------------------------------------------------------------------|
| <b>B Lymphocytes</b>                                                         |                                                                                                                                                                                                 |
| <b>Subset</b>                                                                | <b>Molecular Markers</b>                                                                                                                                                                        |
| Plasma                                                                       | CD19 <sup>+</sup> , CD20 <sup>+/-</sup> , CD138 <sup>+(Mid to High)</sup>                                                                                                                       |
| Transitional                                                                 | CD19 <sup>+</sup> , CD138 <sup>-</sup> , CD38 <sup>Mid</sup> , IgD <sup>+(Mid to High)</sup>                                                                                                    |
| Plasmablast                                                                  | CD19 <sup>+</sup> , CD138 <sup>-</sup> , CD38 <sup>High</sup> , IgD <sup>+/- (mostly -)</sup>                                                                                                   |
| Germinal Center                                                              | CD19 <sup>+</sup> , CD138 <sup>-</sup> , CD38 <sup>Mid</sup> , IgD <sup>-</sup>                                                                                                                 |
| Naïve                                                                        | CD19 <sup>+</sup> , CD138 <sup>-</sup> , CD38 <sup>Low</sup> , CD27 <sup>-</sup> , IgD <sup>+(Mid to High)</sup>                                                                                |
| Marginal Zone Like (MZ-Like)                                                 | CD19 <sup>+</sup> , CD138 <sup>-</sup> , CD38 <sup>Low</sup> , CD27 <sup>+(Mid to High)</sup> , IgD <sup>+(Mid to High)</sup>                                                                   |
| Memory                                                                       | CD19 <sup>+</sup> , CD138 <sup>-</sup> , CD38 <sup>Low</sup> , CD27 <sup>+(Mid to High)</sup> , IgD <sup>-</sup>                                                                                |
| Double Negative                                                              | CD19 <sup>+</sup> , CD138 <sup>-</sup> , CD38 <sup>Low</sup> , CD27 <sup>-</sup> , IgD <sup>-</sup>                                                                                             |
| <b>T lymphocytes</b>                                                         |                                                                                                                                                                                                 |
| <b>Subset</b>                                                                | <b>Molecular Markers</b>                                                                                                                                                                        |
| CD4 <sup>+</sup>                                                             | CD19 <sup>-</sup> , CD4 <sup>+(Mid to High)</sup> , CD8 <sup>-</sup>                                                                                                                            |
| CD8 <sup>+</sup>                                                             | CD19 <sup>-</sup> , CD4 <sup>-</sup> , CD8 <sup>+(Mid to High)</sup>                                                                                                                            |
| Naïve                                                                        | CD19 <sup>-</sup> , CD4 <sup>+</sup> or CD8 <sup>+</sup> , CCR7 <sup>+(High)</sup> , CD45RA <sup>+(Mid to High)</sup> , CD45RO <sup>-</sup> , CD28 <sup>+</sup> , CD95 <sup>-</sup>             |
| Stem Cell Memory                                                             | CD19 <sup>-</sup> , CD4 <sup>+</sup> or CD8 <sup>+</sup> , CCR7 <sup>+(High)</sup> , CD45RA <sup>+(Mid to High)</sup> , CD45RO <sup>-</sup> , CD28 <sup>+</sup> , CD95 <sup>+(Low to Mid)</sup> |
| Central Memory                                                               | CD19 <sup>-</sup> , CD4 <sup>+</sup> or CD8 <sup>+</sup> , CCR7 <sup>+</sup> , CD45RA <sup>-</sup> CD45RO <sup>+(Mid to High)</sup> , CD28 <sup>+(Mid to High)</sup>                            |
| Transitional Memory                                                          | CD19 <sup>-</sup> , CD4 <sup>+</sup> or CD8 <sup>+</sup> , CCR7 <sup>-</sup> , CD45RA <sup>-</sup> CD45RO <sup>+(Mid)</sup> , CD28 <sup>+(Mid to High)</sup>                                    |
| Effector Memory                                                              | CD19 <sup>-</sup> , CD4 <sup>+</sup> or CD8 <sup>+</sup> , CCR7 <sup>-</sup> , CD45RA <sup>-</sup> CD45RO <sup>+(Mid)</sup> , CD28 <sup>-</sup>                                                 |
| Terminal Effector Memory                                                     | CD19 <sup>-</sup> , CD4 <sup>+</sup> or CD8 <sup>+</sup> , CCR7 <sup>-</sup> , CD45RA <sup>-</sup> CD45RO <sup>-</sup> , CD28 <sup>-</sup>                                                      |
| TEMRA CD4 <sup>+</sup> Cells                                                 | CD19 <sup>-</sup> , CD4 <sup>+</sup> or CD8 <sup>+</sup> , CCR7 <sup>-</sup> , CD45RA <sup>+(High)</sup> , CD45RO <sup>-</sup> , CD28 <sup>-</sup>                                              |

|      |                                                                   |
|------|-------------------------------------------------------------------|
| Tfh  | CD19-, CD4+, CD8- , PD-1+, CXCR5+, CD127+, Intracellular BCL-6+/- |
| Treg | CD19-, CD4+, CD8- , CD25+, CD127+, Intracellular FoxP3+           |
| Th17 | CD19-, CD4+, CD8- , Intracellular RoR $\gamma$ T+                 |

364

365 **KSHV+ plasma cells are associated with a specific combination of IL-21 producing T cells.**

366 We wanted to determine whether IL-21 secretion by any particular T cell subset was correlated  
367 with susceptibility to KSHV infection in our experiments. To do this, we performed B cell  
368 immunophenotyping analysis to determine the extent and distribution of KSHV infection in the  
369 same cultures where ICCS was performed on T cell subsets. When we examined correlations  
370 between IL-21 secretion by T cell subsets and overall KSHV infection in B cells (Supplemental  
371 Table 5A) we found that only the frequency of IL-21+ CD8+ central memory cells were  
372 significantly correlated ( $r=0.57$ ,  $p=0.03$ ) (Fig 7A) and there were no significant correlations  
373 between the iMFI of IL-21 in T cell subsets and overall GFP+ B cells at 3dpi (Supplemental Table  
374 5B). When we examined correlations between baseline T cell subsets and infection at 3dpi, the  
375 only significant correlation was a negative impact of CD4+ CD45RO+ T cells ( $r=-0.57$ ,  $p=0.03$ )  
376 (Supplemental Table 5C). Given that these experiments rely on native IL-21 secretion over time  
377 in the culture system, as opposed to high levels of recombinant IL-21 added at day 0 in our previous  
378 experiments (Fig 2), we hypothesized that impacts on total GFP may be absent at this timepoint  
379 because KSHV targeting and manipulation of plasma cell frequencies in response to IL-21  
380 precedes the effect on total infection. Thus, we examined correlations between plasma cell  
381 infection in the context of subset-specific IL-21 secretion by T cells. In this analysis, we found that  
382 (1) the baseline frequency of CD8+ central memory cells ( $r=0.59$ ,  $p=0.02$ ), (2) their frequency  
383 within IL-21+ at 3dpi ( $r=0.82$ ,  $p=0.0003$ ) and (3) their iMFI at 3dpi ( $r=0.75$ ,  $p=0.002$ ) significantly

384 correlated with plasma cell targeting (Fig 7B and Supplemental Figure 2 B-D). Although CD8+  
385 central memory cells are a low-frequency subset, they are significant contributors to IL-21  
386 secretion within CD8+ cells based on iMFI (Fig 6F) and they show redundant correlations in our  
387 data that indicate they are important for the early establishment of KSHV infection in tonsil  
388 lymphocytes. In addition, the frequency of both CD4+ and CD8+ T cells that express RoR $\gamma$ T+ (the  
389 Th17/Tc17-defining transcription factor) within IL-21+ T cells were significantly correlated with  
390 plasma cell targeting by KSHV (Fig 7C and Supplemental Figure 2B). These correlations were  
391 stronger for CD4+ RoR $\gamma$ T+ cells and were coupled with a significant negative correlation with  
392 KSHV-infection of naïve T cells (Supplemental Figure 2B). In this data, we noticed that the same  
393 two tonsil specimens were driving the positive correlations between plasma cell targeting by  
394 KSHV and IL-21 secretion by CD8+ central memory, CD4+ RoR $\gamma$ T+, and CD8+ RoR $\gamma$ T+ T cells  
395 (Fig 7B&C). We next correlated the iMFI of these three T cell subsets (CD8+ central memory,  
396 CD4+ RoR $\gamma$ T+, and CD8+ RoR $\gamma$ T+; hereafter referred to as “subsets of interest”) with both GFP+  
397 plasma cells and total plasma cells, which were significantly elevated in KSHV-infected conditions  
398 in response to IL-21 supplementation (Fig 2E). Consistent with our previous dataset (Fig 2F), the  
399 targeting of plasma cells by KSHV is directly correlated with the total frequency of plasma cells  
400 (Fig 7D, top left panels). The iMFI of our T cell subsets of interest was significantly correlated  
401 with GFP+ plasma cells but was not correlated to total plasma cell numbers. However, the same  
402 two tonsil samples driving the previous correlations did show elevated plasma cell frequencies  
403 together with elevated T cell iMFI in this data (Fig 7D, red boxes) while the lack of correlation in  
404 this data was driven by samples with high plasma cell frequencies where high KSHV targeting of  
405 plasma cells was absent and the iMFI for at least one of the T cell subsets was low. This may  
406 indicate that other factors can influence total plasma cell numbers, but both total plasma cells and

407 GFP+ plasma cells are only simultaneously elevated when the IL-21 producing T cells are also  
408 present. Moreover, this data indicates that all three IL-21 producing T cells are necessary for the  
409 combined plasma cell phenotype. Indeed, we observed direct correlations between the iMFI values  
410 of all three T cell subsets of interest, further supporting the conclusion that it is actually the  
411 combination of factors rather than independent contributions of each T cell subset that is driving  
412 the combined increases in plasma cell frequencies and plasma cell targeting in KSHV-infected  
413 conditions.

414 The sample numbers in our dataset were not sufficient for true multivariate analysis with the large  
415 number of T cell subsets analyzed. However, multiple pairwise correlations can provide some  
416 further insight into this phenomenon. Indeed, we observe highly significant correlations between  
417 all three T cell subset based on their frequency at baseline and their frequency at 3dpi (Fig 8A).  
418 Interestingly, there were distinctively separate populations of samples in our analysis where the  
419 three T cell subsets were either all low or all high, and this distinction was particularly obvious  
420 within the 3 dpi frequencies (Fig 8A, right). Similarly, the frequency of these subsets within IL-  
421 21+ and the iMFI of IL-21 in these subsets are also significantly correlated, but only in the KSHV-  
422 infected samples (Fig 8B). However, the IL-21 correlations were relatively weak compared to the  
423 frequency correlations indicating that additional functions of this T cell milieu that are not directly  
424 related to IL-21 secretion may also influence the plasma cell targeting phenotype. Finally, we  
425 wanted to determine whether any other T cell subsets correlated with all three subsets, and may be  
426 additionally contributing to the T cell milieu which promotes plasma cell targeting by KSHV.  
427 Since 3 dpi frequency yielded the strongest correlations within the T cell data (Fig 8A, right), we  
428 performed pairwise correlations between our three subsets of interest and the remaining T cell  
429 subsets in the analysis (Fig 8C). The data reveals that the frequencies of all three subsets of interest

430 are also significantly correlated with the frequency of CD4<sup>+</sup> stem cell memory and samples where  
431 BCL6<sup>+</sup> cells predominate within the CD4<sup>+</sup> Tfh subset. Taken together, these results indicate that  
432 there is a defined T cell milieu in some tonsil samples that includes elevated frequencies of IL-21-  
433 producing CD8<sup>+</sup> central memory, CD4<sup>+</sup> RoR $\gamma$ T<sup>+</sup>, and CD8<sup>+</sup> RoR $\gamma$ T<sup>+</sup> T cells, as well as other T  
434 cell subsets, and this particular milieu correlates with the ability of KSHV to increase plasma cell  
435 numbers and target plasma cells for infection at early timepoints.

## 436 **Discussion**

437 Our results presented in this study indicate that KSHV can influence cytokine production in tonsil-  
438 derived lymphocytes and that the host inflammatory state contributes to the dramatic variation in  
439 susceptibility we observe among our tonsil lymphocyte specimens [10]. This result is not  
440 surprising considering dysregulation of the inflammatory environment is a hallmark of all KSHV-  
441 associated malignancies [25, 28, 29]. However, the role of the baseline inflammatory environment  
442 in the oral cavity as a potentially modifiable susceptibility factor for the acquisition of KSHV  
443 infection in humans is an interesting consideration stemming from these results that deserves  
444 further study.

445 In this study, we uncovered a role for IL-21 signaling in the establishment of KSHV infection in  
446 tonsil lymphocytes. That IL-21 plays a role in this process is not particularly surprising in the  
447 context of the well-characterized role of IL-21 in the closely-related murine MHV-68 model.  
448 Specifically, Collins and Speck recently used IL-21R knockout mice to demonstrate that IL-21  
449 signaling is critical for the establishment of MHV68 latency specifically in B cells. Interestingly,  
450 this study showed that the mechanisms of decreased infection were related to decreases in both  
451 germinal center and plasma cell frequencies as well as decreased infection in both the germinal

452 center and plasma cell compartment at later timepoints post-infection [20], suggesting a critical  
453 mechanism for IL-21 in MHV68 transit of the germinal center and differentiation of follicular-  
454 derived plasma cells. The current study represents the first examination of similar mechanisms  
455 for the importance of IL-21 in primary KSHV infection in human cells. The relationship between  
456 plasma cell differentiation and IL-21 is well-characterized in human immunology [14, 15], and we  
457 previously showed that plasma cells are highly targeted during early KSHV infection [10].  
458 However, these results are novel and interesting in that they demonstrate direct correlations  
459 between plasma cell frequencies, plasma cell infection, and overall susceptibility to KSHV  
460 infection (Fig 2F and 7D). Specifically, the synergistic effect of KSHV infection and IL-21  
461 signaling increasing plasma cell frequencies (Fig 2E) plays a role in early infection events that  
462 ultimately influences the magnitude of initial dissemination of KSHV within the B cell  
463 compartment. Whether this relationship is due a direct effect of the plasma cells themselves or an  
464 indirect effect of the process by which IL-21 and KSHV infection manipulates plasma cell  
465 frequencies remains to be established, and is the subject of ongoing studies in our laboratory.  
466 Moreover, although we have correlative data suggesting that KSHV and IL-21 influence the  
467 differentiation of plasma cells (Fig 3E), the data presented herein do not directly interrogate  
468 whether KSHV drives B cell differentiation in our tonsil lymphocyte model. Studies are currently  
469 ongoing in our laboratory to examine whether KSHV infection influences B cell differentiation  
470 and what viral factors influence this process.

471 Our results herein implicate a particular T cell milieu in promoting plasma cell frequencies and  
472 plasma cell targeting during early KSHV infection. Our current analysis identifies IL-21+ CD8+  
473 central memory, IL-21+ CD4+ RoR $\gamma$ T+, and IL-21+ CD8+ RoR $\gamma$ T+ as well as BCL6+ Tfh and  
474 CD4+ stem cell memory subsets independent of IL-21 secretion as participants in this milieu. To

475 our knowledge, this particular combination of T cells does not have a previously defined function  
476 in tonsillar immunology. It will be interesting to perform true multivariate analysis to establish the  
477 contribution of the baseline T cell milieu to KSHV infection once we have analyzed enough unique  
478 tonsil specimens to make such analysis feasible. Based upon our current data, we would  
479 hypothesize that the T cell composition of tonsil samples at baseline can be used to predict sample-  
480 level susceptibility to KSHV infection. Epidemiological evidence from Africa suggests that  
481 acquisition of KSHV infection in infants is lower than expected based on shedding of KSHV by  
482 household contacts, indicating that unknown factors influence the initial acquisition of KSHV  
483 infection in childhood [30]. Our results at least implicate an immunologically activated state in  
484 the initial establishment of KSHV infection in tonsil lymphocytes, suggesting that prior pathogen  
485 exposure, chronic infection or temporally-associated acute infections may create an inflammatory  
486 state in the tonsil that is permissive for KSHV transmission.

487 Both IL-21 and IL-6, which is highly induced in our KSHV-infected cultures (Fig 1), are involved  
488 in the maintenance and function of RoR $\gamma$ T<sup>+</sup> T cells via STAT3 signaling. Th17/Tc17 cells produce  
489 IL-17A, which is another cytokine that promotes the establishment of chronic MHV68 infection  
490 via promotion of the MHV68-mediated germinal center response [31] and is mechanistically  
491 linked to suppression of T cell-intrinsic IRF-1 [32]. These results are particularly interesting in  
492 light of our current findings showing that IL-21 secretion from, and baseline levels of, RoR $\gamma$ T<sup>+</sup> T  
493 cells correlate with the early targeting of plasma cells during KSHV infection (Fig 7C and  
494 Supplemental Fig 2C), suggesting that the Th17/Tc17 environment in the tonsil may be a critical  
495 factor influencing donor-specific susceptibility to KSHV infection. Indeed, as an important site for  
496 mucosal immunity in the oral cavity, the Th17/Tc17 environment in tonsil is highly dynamic and  
497 physiologically important. In fact, Th17 cells play a major role in host defenses against several



498 pathogens and immunopathogenesis [33, 34]. Many studies have shown that certain parasites  
499 modulate the immune response by inducing Th17 [35, 36]. Previous finding suggest that parasite  
500 infection is linked with KSHV infection in Uganda [37]. Thus, the parasite burden in sub-Saharan  
501 Africa may modulate susceptibility to KSHV infection via manipulating Th17/Tc17 frequencies.

502 Consistent with the MHV68 literature, our current results mechanistically implicate germinal  
503 center cells in these observations (Fig 3E). However, although our *ex vivo* model of KSHV  
504 infection in primary lymphocytes is a powerful tool, it certainly does not recapitulate the complex  
505 interactions that are needed for a functional germinal center reaction, so further examination of  
506 these particular mechanisms will require the utilization of an alternative model system, such as a  
507 humanized mouse. However, the participation of CD8<sup>+</sup> central memory, Th17 and Tc17 cells in  
508 the T cell milieu associated with increased plasma cell targeting indicates that an extrafollicular  
509 pathway may also be active in this process, which is consistent with literature implicating  
510 extrafollicular maturation of KSHV-infected B cells in the pathogenesis of MCD [38].

511 Although CD8<sup>+</sup> T cells are minor contributors to IL-21 secretion compared to CD4<sup>+</sup> T cells, our  
512 data strongly indicates that they participate in the inflammatory milieu that promotes KSHV  
513 dissemination in our model (Fig 7 and Fig 8). Previous studies have shown that CD8<sup>+</sup> T cells can  
514 be observed in B lymphocyte areas of tonsil and provide co-stimulatory signals and cytokines to  
515 support B cell survival [39]. Interestingly, recent studies have shown that IL-6 regulates IL-21  
516 production in CD8<sup>+</sup> T cells in a STAT3-dependent manner, and that CD8<sup>+</sup> T cells induced in this  
517 way can effectively provide help to B cells [40]. Thus, the induction of human IL-6 during KSHV  
518 infection may modulate the function of CD8<sup>+</sup> T cells in a way that favors the establishment and  
519 dissemination of KSHV infection within the lymphocyte compartment independent of traditional

520 CD4+ helper T cells, which would be an interesting dynamic in the context of CD4+ T cell  
521 immunosuppression associated with HIV infection where KSHV-mediated malignancies are  
522 common.

## 523 **Material and Methods**

524 ***Ethics Statement.*** Human specimens used in this research were de-identified prior to receipt, and  
525 thus were not subject to IRB review as human subjects research.

526 ***Reagents and Cell Lines.*** CDw32 L cells (CRL-10680) were obtained from ATCC and were  
527 cultured in DMEM supplemented with 20% FBS (Sigma Aldrich) and Penicillin/Streptomycin/L-  
528 glutamine (PSG/Corning). For preparation of feeder cells CDw32 L cells were trypsinized and  
529 resuspended in 15 ml of media in a petri dish and irradiated with 45 Gy of X-ray radiation using a  
530 Rad-Source (RS200) irradiator. Irradiated cells were then counted and cryopreserved until needed  
531 for experiments. Cell-free KSHV.219 virus derived from iSLK cells [39] was a gift from Javier G.  
532 Ogembo (City of Hope). Human tonsil specimens were obtained from the National Disease  
533 Research Interchange (NDRI; [ndriresource.org](http://ndriresource.org)). Human fibroblasts for viral titering were derived  
534 from primary human tonsil tissue and immortalized using HPV E6/E7 lentivirus derived from  
535 PA317 LXS<sup>N</sup> 16E6E7 cells (ATCC CRL-2203). Antibodies for flow cytometry were from BD  
536 Biosciences and Biolegend and are detailed below. Recombinant human IL-21 was from  
537 Preprotech (200-21) and IL-21 neutralizing antibody was from R&D Systems (991-R2).

538 ***Isolation of primary lymphocytes from human tonsils.*** De-identified human tonsil specimens  
539 were obtained after routine tonsillectomy by NDRI and shipped overnight on wet ice in  
540 DMEM+PSG. All specimens were received in the laboratory less than 24 hours post-surgery and  
541 were kept at 4°C throughout the collection and transportation process. Lymphocytes were  
542 extracted by dissection and maceration of the tissue in RPMI media. Lymphocyte-containing

543 media was passed through a 40µm filter and pelleted at 1500rpm for 5 minutes. RBC were lysed  
544 for 5 minutes in sterile RBC lysing solution (0.15M ammonium chloride, 10mM potassium  
545 bicarbonate, 0.1M EDTA). After dilution to 50ml with PBS, lymphocytes were counted, and  
546 pelleted. Aliquots of  $5(10)^7$  to  $1(10)^8$  cells were resuspended in 1ml of freezing media containing  
547 90% FBS and 10% DMSO and cryopreserved until needed for experiments.

548 ***Infection of primary lymphocytes with KSHV.*** Lymphocytes were thawed rapidly at 37°C, diluted  
549 dropwise to 5ml with RPMI and pelleted. Pellets were resuspended in 1ml  
550 RPMI+20%FBS+100µg/ml DNaseI+ Primocin 100µg/ml and allowed to recover in a low-binding  
551 24 well plate for 2 hours at 37°C, 5% CO<sub>2</sub>. After recovery, total lymphocytes were counted and  
552 naïve B cells were isolated using Mojosort Naïve B cell isolation beads (Biolegend 480068) or  
553 Naïve B cell Isolation Kit II (Miltenyi 130-091-150) according to manufacturer instructions.  
554 Bound cells (non-naïve B and other lymphocytes) were retained and kept at 37°C in RPMI+20%  
555 FBS+ Primocin 100µg/ml during the initial infection process.  $1(10)^6$  Isolated naïve B cells were  
556 infected with iSLK-derived KSHV.219 (dose equivalent to the ID20 at 3dpi on human fibroblasts)  
557 or Mock infected in 400ul of total of virus + serum free RPMI in 12x75mm round bottom tubes  
558 via spinoculation at 1000rpm for 30 minutes at 4°C followed by incubation at 37°C for an  
559 additional 30 minutes. Following infection, cells were plated on irradiated CDW32 feeder cells in  
560 a 48 well plate, reserved bound cell fractions were added back to the infected cell cultures, and  
561 FBS and Primocin (Invivogen) were added to final concentrations of 20% and 100µg/ml,  
562 respectively and recombinant cytokines or neutralizing antibodies were also added at this stage,  
563 depending upon the specific experiment. Cultures were incubated at 37°C, 5% CO<sub>2</sub> for the  
564 duration of the experiment. At 3 days post-infection, cells were harvested for analysis by flow

565 cytometry and supernatants were harvested, clarified by centrifugation for 15 minutes at 15,000  
566 rpm to remove cellular debris, and stored at -80°C for analysis.

567 ***Bead-based immunoassay for supernatant cytokines.*** Clarified supernatants were thawed on ice  
568 and 25µl of each was added to a 13-plex LEGENDplex (Biolegend) bead-based immunoassay  
569 containing capture beads for the following analytes: IL-5, IL-13, IL-2, IL-9, IL-10, IL17A, IL-  
570 17F, IL-6, IL-21, IL-22, IL-4, TNF-α, and IFN-γ. These assays were performed according to the  
571 manufacturer's instructions, data was acquired for 5000 beads per sample (based on approximately  
572 300 beads per analyte recommended by the manufacturer) using a BD FACS VERSE flow  
573 cytometry analyzer and cytokine concentrations in the experimental supernatants was calculated  
574 from standard curves using the LEGENDPlex software.

575 ***Flow cytometry analysis of baseline lymphocyte subsets and KSHV infection.*** Approximately  
576  $5(10)^6$  lymphocytes per condition were harvested into a 96- well round bottom plate at day 0  
577 (baseline) or at 3 days post-infection at 1500 rpm for 5 minutes. Cells were resuspended in 100µl  
578 PBS containing zombie violet fixable viability stain (BL Cat# 423113) and incubated on ice for  
579 15 minutes. After incubation, cells were pelleted and resuspended in 100ul PBS, containing the  
580 following: 2% FBS and 0.5% BSA (FACS Block) was added to the wells. Cells were pelleted at  
581 1500rpm 5 minutes and resuspended in 200ul FACS Block for 10 minutes on ice. Cells were  
582 pelleted at 1500rpm for 5 minutes and resuspended in 50µl of PBS with 0.5% BSA and 0.1%  
583 Sodium Azide (FACS Wash), **For B cell frequencies** 10µl BD Brilliant Stain Buffer Plus and  
584 antibodies as follows: IgD-BUV395 (2.5µl/test BD 563823), CD77-BV510 (2.0 µl/ test BD  
585 563630), CD138- BV650 (2µl/test BD 555462), CD27-BV750 (2µ/test BD 563328), CD19-  
586 PerCPCy5.5 (2.0µl/test BD 561295), CD38-APC (10µl/test BD 560158), CD20-APCH7 (2ul/test

587 BL 302313), IgM (2 $\mu$ l/test BL 314524), IgG (2 $\mu$ l/test BD 561298), IgE (2 $\mu$ l/test BD 744319) and  
588 IL-21 receptor (2 $\mu$ l/test BD 330114). **For baseline T cell frequencies.** For baseline T cell  
589 frequencies 0.5(10)<sup>6</sup> cells from baseline uninfected total lymphocyte samples were stained and  
590 analyzed as above with phenotype antibody panel as follows: CD95-APC (2 $\mu$ l, Biolegend  
591 305611), CCR7-PE (2 $\mu$ l, BD 566742), CD28-PE Cy7 (2 $\mu$ l, Biolegend 302925), CD45RO-FITC  
592 (3 $\mu$ l, Biolegend 304204), CD45RA-PerCP Cy5.5 (2 $\mu$ l, 304121), CD4-APC H7 (2 $\mu$ l, BD 560158),  
593 CD19-V510 (3 $\mu$ l, BD 562953), CD8-V450 (2.5 $\mu$ l, BD 561426). and incubated on ice for 15  
594 minutes. After incubation, 150 $\mu$ l FACS Wash was added. Cells were pelleted at 1500rpm for 5  
595 minutes followed by two washes with FACS Wash. Cells were collected in 200 $\mu$ l FACS Wash for  
596 flow cytometry analysis. Cells were analyzed using an LSR Fortessa X-20 cell analyzer (BD  
597 Biosciences). BD CompBeads (51-90-9001229) were used to calculate compensation for all  
598 antibody stains and methanol-fixed Namalwa cells (ATCC CRL1432) +/- KSHV were used to  
599 calculate compensation for GFP and the fixable viability stain. Flow cytometry data was analyzed  
600 using FlowJo software and exported for quantitative analysis in R as described below.

601 ***ICCS for IL-21 secretion.*** At 3dpi, cultures were treated for 6 hours with [4 ul for every 6ml of  
602 cel culture] monensin to block cytokine secretion. Following incubation, approximately 1 million  
603 cells were harvested and viability and surface staining for T cell lineage markers was performed  
604 as described above. After the final wash, cells were fixed for 10 minutes in BD cytofix/cytoperm  
605 (51-2090KZ), pelleted and further treated for 10 minutes with cytofix/cytoperm+10% DMSO  
606 (superperm) to more effectively get intracellular antibodies into the nucleus. Intracellular  
607 antibodies, as follows, were diluted in 1x BD Permwash (51-2091KZ) and left on fixed cells  
608 overnight at 4°C. RoR- $\gamma$ T-BV421 (563282, 5 $\mu$ l/test), FoxP3-BB700 (566527, 5  $\mu$ l/test), IL-21-

609 APC (513007, 5 µl/test), BLC6-BV711 (561080, 5µl/test). Cells were then washed twice with 1x  
610 permwash and analyzed as described above.

611 **RT-PCR.** At 3 days post infection,  $1(10)^6$  lymphocytes were harvested into an equal volume of  
612 Trizol and DNA/RNA shield (Zymo Research R110-250). Total RNA was extracted using using  
613 Zymo Directzol Microprep (Zymo Research R2060) according to manufacturer instructions. RNA  
614 was eluted in 10µl H<sub>2</sub>O containing 2U RNase inhibitors and a second DNase step was performed  
615 for 30 minutes using the Turbo DNA-Free kit (Invitrogen AM1907M) according to manufacturer  
616 instructions. One-step RT-PCR cDNA synthesis and preamplification of GAPDH, LANA and  
617 K8.1 transcripts was performed on 15ng of total RNA using the Superscript III One-step RT-PCR  
618 kit (ThermoFisher 12574026).

619 Duplicate no RT (NRT) control reactions were assembled for each sample containing only  
620 Platinum Taq DNA polymerase (Thermofisher 15966005) instead of the Superscript III RT/Taq  
621 DNA polymerase mix. After cDNA synthesis and 20 cycles of target pre-amplification, 2µl of pre-  
622 amplified cDNA or NRT control reaction was used as template for multiplexed real-time PCR  
623 reactions using TaqProbe 5x qPCR MasterMix -Multiplex (ABM MasterMix-5PM), 5% DMSO,  
624 primers at 900nM and probes at 250nM against target genes. All primer and probe sequences used  
625 in these assays have been previously published [10]. Real time PCR was performed using a 40-  
626 cycle program on a Biorad real time thermocycler. Data is represented as quantitation cycle (Cq)  
627 and assays in which there was no detectable Cq value were set numerically as Cq = 41 for analysis  
628 and data visualization. The expression of each gene was normalized to that of a housekeeping  
629 gene *GAPDH*.

630 **Statistical Analysis.** The indicated data sets and statistical analysis were performed in Rstudio  
631 software using ggplot2 [41], ggcorrplot [42] , ggally [43] and tidyverse [44] packages. Statistical  
632 analysis was performed using rstatix [45] package. Specific methods of statistical analysis  
633 including Anova, independent t-test and Pearson correlations and resulting values for significance  
634 and correlation are detailed in the corresponding figure legends.

635

## 636 **Figure Legends**

### 637 **Figure 1: KSHV alters cytokine secretion and cytokines affect the establishment of infection.**

638 33 replicate infections using 24 unique tonsil specimens were performed using KSHV.219  
639 infection of naïve B lymphocytes followed by reconstitution of the total lymphocyte environment  
640 and culture on CDW32 feeder cells. At 3 dpi, cells were collected for flow cytometry analysis for  
641 infection (GFP) and B cell subsets using our previously-characterized immunophenotyping panel  
642 and supernatants were collected for analysis of cytokines by multiplex immunoassay (Biolegend  
643 Legendplex) (A) cytokine production in Mock and KSHV-infected cultures showing individual  
644 sample quantities and means (red diamonds, top panels) and matched Mock and KSHV samples  
645 to show trends of induction/repression (bottom panels) Statistical analysis was performed by one-  
646 way repeated measures ANOVA.  $p=0.01$   $F=7.06$  for IL-5,  $p=0.0001$   $F=14$  for IL-6,  $p=0.5$   $F=4.3$   
647 for IL-4 (B) Data as in (A) showing the level of induction or repression of each cytokine  
648 comparing KSHV to matched Mock cultures (C) Induction or repression of all cytokines (left y-  
649 axis) on a per-sample basis ordered based on overall susceptibility based on percentage of GFP+  
650 B lymphocytes in the same culture (right y-axis, red diamonds) (D) Pairwise correlations using  
651 Pearson method between cytokine concentration (y-axis) and overall infection (x-axis) in KSHV-  
652 infected lymphocyte cultures (E) Pairwise correlations using Pearson method between cytokine

653 concentration (y-axis) and Percent GFP<sup>+</sup> within CD138<sup>+</sup> (x-axis) in KSHV-infected lymphocyte  
654 cultures. For panels A, B, D and E colors indicate individual tonsil specimens and can be compared  
655 between panels. For D and E, significant correlations are indicated with r and p-values on the  
656 individual panels.

657

658 **Figure 2: IL-21 supplementation increases overall KSHV infection and plasma cell**  
659 **frequencies.** Naïve B Lymphocytes from 12 tonsil donors were infected with KSHV.219 and  
660 cultured with indicated doses of recombinant human IL-21 and analyzed at 3dpi by flow cytometry  
661 (A) the dose effect of IL-21 supplementation on GFP<sup>+</sup> viable B lymphocytes. (B) data as in (A)  
662 normalized to the untreated control for each specimen. (C) 12 additional tonsil donors analyzed as  
663 in (A) with only 100pg/ml IL-21 treatment. Red diamonds indicate group means.  $p=0.02$ ,  $F=6.4$   
664 via one-way repeated measures ANOVA. Tonsil lymphocyte specimens from (C) were stained for  
665 B cell immunophenotypes and analyzed by flow cytometry and GFP for KSHV infection to  
666 determine (D) GFP frequencies within B cell subsets for KSHV-infected cultures and (E) total B  
667 cell subset frequencies for each condition. Top panels in (D) and (E) show individual sample  
668 quantities and means (red diamonds) and bottom panel in (D) shows trends of increased/decreased  
669 subset targeting on a per-sample basis. Colored points denote unique tonsil specimens and can be  
670 compared between panels D and E. See Supplemental Table 1A for full statistics for all subsets  
671 for panel (D) and Supplemental Table 1B for full statistics for all subsets in panels (C) and (E).  
672 (F) Pearson correlation between overall GFP<sup>+</sup> B cells in KSHV-infected, IL-21 treated cultures as  
673 in (C) and the level of plasma cells (right) and infection of plasma cells (left). Blue line is linear  
674 model regression and grey shading indicates 95% confidence interval.



675 **Figure 3: IL-21 neutralization inhibits the establishment of KSHV infection.** Naïve B cells  
676 from 11 unique tonsil specimens were Mock or KSHV-infected and indicated concentrations of  
677 IL-21 neutralizing antibody was added to the resulting total lymphocyte cultures. Cultures were  
678 analyzed at 3 dpi for B lymphocyte immunophenotypes and the distribution of KSHV infection  
679 via GFP expression. Total GFP<sup>+</sup> viable B lymphocytes represented as (A) raw percentages or (B)  
680 normalized to the untreated control for each tonsil sample. For (A) one-way repeated measures  
681 ANOVA shows  $p=0.00001$ ,  $F=9.4$  for the main effect of IL-21 neutralization and Dunnett's test  
682 reveals  $p=0.03$  at the  $100\mu\text{g/ml}$  dose. (C) Effect of indicated doses of IL-21 neutralizing antibody  
683 on KSHV infection of indicated B cell subsets normalized to the untreated frequency of each subset  
684 within each tonsil sample. One-way repeated measures ANOVA on the raw data reveals a  
685 significant effect on infection of transitional B cells ( $p=0.01$ ,  $F=4.0$ ). Full statistical analysis for  
686 all subsets can be found in Supplemental Table 2A. (D) frequencies of plasma cell subsets in the  
687 cultures. Full statistical analysis for all subsets can be found in Supplemental Table 2B. Post-hoc  
688 paired T-tests showed significant effect of  $200\mu\text{g/ml}$  neutralizing antibody on total plasma cells  
689 ( $p=0.02$ ) and CD20<sup>+</sup> plasma cells ( $p=0.005$ ) in Mock cultures only. (E) Correlation between the  
690 effect of IL-21 neutralization on overall infection (x-axis) and the effect of IL-21 neutralization on  
691 the contribution of indicated subsets to KSHV infection (y-axis). Shapes indicate doses in this  
692 panel (circle= $100\mu\text{g/ml}$ , triangle= $200\mu\text{g/ml}$ , square= $400\mu\text{g/ml}$ ). Statistics from Pearson's linear  
693 correlation are as follows: CD20<sup>+</sup> plasma cells ( $r=0.6$ ,  $p=0.0002$ ), plasma cells ( $r=0.6$ ,  $p=0.0003$ ),  
694 transitional ( $r=0.5$ ,  $p=0.004$ ), germinal center ( $r=-0.4$ ,  $p=0.02$ ). For panels C-E colors indicate  
695 unique tonsil specimens and can be compared between these panels and red diamonds indicate the  
696 mean value for all tonsil specimens. RT-PCR analysis of KSHV transcripts at 3 dpi in 8 unique  
697 tonsil specimens with either IL-21 supplementation at  $100\text{ pg/ml}$  (Fig 2) or IL-21 neutralizing

698 antibody at 100 $\mu$ g/ml with LANA (latent) and K8.1 (lytic) transcript targets. No RT controls were  
699 used to determine that RT-PCR signal is not due to DNA contamination (F) Cq values for viral  
700 targets normalized to the within-sample Cq for GAPDH (G) GAPDH-normalized values further  
701 normalized to the within-sample value for the untreated control.

702 **Figure 4: IL21 receptor distribution in primary human tonsil B lymphocytes and its effect**  
703 **on KSHV infection and the response to IL-21 supplementation.** B cell immunophenotyping  
704 analysis including IL-21R was performed at baseline (Day 0) for 10 unique tonsil specimens  
705 (Supplemental Figure 1A). (A) total percentage of IL-21R<sup>+</sup> within viable CD19<sup>+</sup> B cells. (B)  
706 Percent of individual B cell subsets within IL-21<sup>+</sup> B cells. Red diamonds indicate the mean value  
707 for all tonsil specimens and (C) distribution of B cell subsets within IL-21<sup>+</sup> on a per-tonsil basis.  
708 (D) MFI of IL-21 receptor within B cell subsets. Red diamonds indicate the mean values for each  
709 subset-and colors indicate specific tonsil specimens and can be compared between panels (B, D, E  
710 and F). (E) Pearson correlation analysis of baseline IL-21R<sup>+</sup> plasmablasts with total GFP<sup>+</sup> B cells  
711 at 3 dpi. Full correlation analysis for all subsets can be found in Supplemental Table 3A (F) Pearson  
712 correlation analysis of baseline IL-21R<sup>+</sup> naïve B cells with the effect of IL-21 supplementation on  
713 overall KSHV infection in the same tonsil specimens at 3dpi. Full correlation analysis for all  
714 subsets can be found in Supplemental Table 3B.

715 **Figure 5: IL-21R<sup>+</sup> plasmablasts increase in response to KSHV infection and IL-21R<sup>+</sup> Plasma**  
716 **cells increase in response to IL-21 only in KSHV<sup>+</sup> cultures.** (A) Total percentage of IL-21R<sup>+</sup>  
717 B cells at baseline and 3dpi within Mock, Mock+100pg/ml IL-21, KSHV, KSHV+ 100pg/ml IL-  
718 21 conditions. (B) conditions as in (A) for mean fluorescence intensity of IL-21R staining in IL-  
719 21R<sup>+</sup> B cells (C) Frequency and (D) MFI of IL-21R for IL-21R<sup>+</sup> B cell within untreated GFP<sup>+</sup>,

720 GFP- and 100pg/ml IL-21 GFP+, GFP- cells. Top panels in (C) and (D) show individual sample  
721 quantities and means (red diamonds) and bottom panels show trends of increase/decrease  
722 comparing GFP+ to GFP- within the same culture. (E) Distribution of IL-21 receptor on B cell  
723 subsets at day 0 (baseline) or 3dpi within Mock, Mock+100pg/ml IL-21, KSHV or KSHV+  
724 100pg/ml IL-21 conditions. Red diamonds indicate the mean values for each condition and  
725 significant differences were assessed via two-way repeated measures ANOVA (Supplemental  
726 Table 4A) and post-hoc paired T-tests for both culture/infection conditions (Supplemental Table  
727 4B) and IL-21 treatment (Supplemental Table 4C). (F) Pearson correlation analysis of the  
728 frequency of plasmablasts within IL-21+ and overall infection at 3dpi (left). GFP response (y=axis)  
729 and plasmablast response x-axis to IL-21 treatment for each sample (right).

730 **Figure 6: Characterization of T cell subsets producing IL-21 in primary human tonsil B**  
731 **lymphocytes.** T cells were analyzed by surface immunophenotyping, intracellular transcription  
732 factor staining and ICCS for IL-21 secretion (Supplemental Figure 1B&C) in Mock and KSHV-  
733 infected total lymphocyte cultures at 3 dpi in 14 unique tonsil specimens. (A) Total IL-21+ viable  
734 non-B cells (B) percent of CD4+ or CD8+ T cells within IL-21+ (C) iMFI of IL-21 within CD4+  
735 and CD8+ T cells in Mock and KSHV culture. For (A), (B) and (C) red diamonds indicate the  
736 mean value for the condition and colors indicate specific tonsil specimens and can be compared  
737 between the panels. (D) iMFI of IL-21 within CD4+ vs CD8+ T cells in Mock and KSHV-infected  
738 cultures (indicated by shape). Red box denotes samples where CD4+ and CD8+ iMFI are  
739 comparable (E) Frequency of T cell subsets within IL-21+ in Mock (red) and KSHV-infected  
740 (blue) cultures \*p=0.05; \*\*p=0.04; \*\*\*p=0.003 (F) data as in (E) for iMFI of T cell subsets within  
741 IL-21+

742 **Figure 7: Influence of IL-21 secreting T cell subsets on KSHV infection, plasma cell**  
743 **frequencies and plasma cell targeting.** Lymphocyte cultures from the experiments shown in Fig  
744 6 were further analyzed for B cell subsets and the magnitude and distribution of KSHV infection.  
745 (A) Pearson correlation analysis of total GFP<sup>+</sup> within viable, CD19<sup>+</sup> B lymphocytes at 3 dpi with  
746 the contribution of CD8<sup>+</sup> central memory T cell subsets to IL-21 secretion. Complete statistics for  
747 all T cell subsets can be found in Supplemental Table 5A. (B) correlation analysis of GFP<sup>+</sup> plasma  
748 cells at 3dpi and frequency of CD8<sup>+</sup> central memory T cells at day 0 (left), IL-21 secretion by  
749 CD8<sup>+</sup> central memory T cells at 3dpi (middle), iMFI of IL-21<sup>+</sup> CD8<sup>+</sup> central memory T cells at  
750 3dpi (right). (C) Pearson correlation analysis of GFP<sup>+</sup> plasma cells and frequency of CD4<sup>+</sup> (left)  
751 or CD8<sup>+</sup> (right) RoR $\gamma$ T<sup>+</sup> within IL-21<sup>+</sup> T cells. (D) pairwise correlation analysis between total  
752 plasma cell frequency, GFP<sup>+</sup> plasma cell frequency, and iMFI of CD4<sup>+</sup> RoR $\gamma$ T<sup>+</sup>, CD8<sup>+</sup> central  
753 memory and CD8<sup>+</sup> RoR $\gamma$ T<sup>+</sup> T cells at 3dpi in KSHV-infected conditions only. Pearson's  
754 correlation coefficients are listed in the top right panels. \*\*\*p<0.001, \*\*p<0.01, \*p<0.05. For all  
755 panels in this figure tonsil sample designations (ND#) are listed adjacent to color-coded data  
756 points. Grey shading indicates 95% confidence intervals.

757 **Figure 8: IL-21-producing CD8<sup>+</sup> central memory, CD4<sup>+</sup> RoR $\gamma$ T<sup>+</sup>, and CD8<sup>+</sup> RoR $\gamma$ T<sup>+</sup> T cells**  
758 **indicate a T cell milieu that influences KSHV infection of plasma cells.** (A) Pairwise Pearson  
759 correlations between T cell subsets of interest (CD4<sup>+</sup> RoR $\gamma$ T<sup>+</sup>, CD8<sup>+</sup> central memory and CD8<sup>+</sup>  
760 RoR $\gamma$ T<sup>+</sup>) based on their frequency at baseline (left) and their frequency at 3dpi (right) in Mock  
761 (blue) or KSHV-infected (red) conditions. (B) Pairwise Pearson correlations between T cell subset  
762 (CD4<sup>+</sup> RoR $\gamma$ T<sup>+</sup>, CD8<sup>+</sup> central memory and CD8<sup>+</sup> RoR $\gamma$ T<sup>+</sup>) based on their frequency within IL-  
763 21<sup>+</sup> (left) and the iMFI of IL-21 at 3dpi (right) in Mock (blue) or KSHV-infected (red) conditions.  
764 For (A) and (B) \*\*\*p<0.001, \*\*p<0.01, \*p<0.05 and grey shading indicates 95% confidence

765 intervals (C) correlogram of-pairwise correlations between 3 dpi frequencies of the T cell subsets  
766 of interest (CD4+ RoR $\gamma$ T+, CD8+ central memory and CD8+ RoR $\gamma$ T+) (x-axis) and the 3 dpi  
767 frequencies of all T cell subsets analyzed (y-axis). Pearson's r values with an absolute value greater  
768 than or equal to 0.53 are statistically significant for this dataset.

## 769 **Supplemental Materials**

770 **Supplemental Table 1A:** One-way repeated measures ANOVA for the effect of IL-21 treatment  
771 on GFP distribution in B cell subsets. Sorted by p-value.

772 **Supplemental Table 1B:** Two-way repeated measures ANOVA for the effect of KSHV  
773 infection (Cond) and IL-21 treatment (Tx) on total GFP and frequencies of B cell subsets. Sorted  
774 by p-value.

775 **Supplemental Table 2A:** One-way repeated measures ANOVA analysis for the dose effect of  
776 IL-21 neutralizing antibody on GFP frequency within B cell subsets. Sorted by p value.

777 **Supplemental Table 2B:** One-way repeated measures ANOVA analysis for the dose effect of  
778 IL-21 neutralizing antibody on B cell subset frequencies. Sorted by p value.

779 **Supplemental Table 3A:** Pairwise correlations using Pearson's method between total GFP+  
780 cells in KSHV-infected conditions at 3 dpi and the baseline (0 dpi) frequency of each B cell  
781 subset within IL-21R+ cells. Sorted by p value.

782 **Supplemental Table 3B:** Pairwise correlations using Pearson's method between the change in  
783 GFP+ cells in response to 100ng/ml IL-21 treatment (GFP+ Treatment- GFP+ Control) in  
784 KSHV-infected conditions at 3 dpi and the baseline (0 dpi) frequency of each B cell subset  
785 within IL-21R+ cells. Sorted by p value.

786 **Supplemental Table 3C:** Pairwise correlations using Pearson's method between the change in  
787 frequency of plasma cells with IL-21 treatment at 3dpi (PC treated – PC control) in KSHV-  
788 infected conditions at 3 dpi and the baseline (0 dpi) frequency of each B cell subset within IL-  
789 21R+ cells. Sorted by p value.

790 **Supplemental Table 4A:** Two-way repeated measures ANOVA analysis for the effect of IL-21  
791 treatment (Tx) and Baseline vs. Mock vs. KSHV infection (Cond) on the frequency of B cell  
792 subsets within IL-21R+ at 3 dpi. Sorted by p value.

793 **Supplemental Table 4B:** Post-hoc paired T-test for the Cond effects in the ANOVA analysis  
794 shown in Table 4A. Significance indicates differences between Baseline (BL), Mock and KSHV-  
795 infected cultures grouped by IL-21 treatment (Tx); NT=untreated, IL21=100ng/ml IL-21 treated.  
796 Sorted by adjusted p-value using Holm correction for multiple comparisons.

797 **Supplemental Table 4C:** Post-hoc paired T-test for the Tx effects in the ANOVA analysis  
798 shown in Table 4A. Significance indicates differences between NT=untreated, IL21=100ng/ml  
799 IL-21 treated grouped by infection condition (Mock or KSHV-infected). Sorted by p-value.

800 **Supplemental Table 4D:** Two-way repeated measures ANOVA analysis for the effect of IL-21  
801 treatment (TX) and Baseline vs. Mock vs. KSHV infection (Cond) on the MFI of IL-21R within  
802 IL-21R+ B cell subsets at 3 dpi. Sorted by p value.

803 **Supplemental Table 5A:** Pairwise correlations using Pearson's method between T cell  
804 frequencies within IL-21+ T cells and total GFP+ B lymphocytes at 3 dpi. Sorted by p value.  
805 **Supplemental Table 5B:** Pairwise correlations using Pearson's method between the iMFI of IL-  
806 21 for T cell subsets and total GFP+ B lymphocytes at 3 dpi. Sorted by p value.  
807 **Supplemental Table 5C:** Pairwise correlations using Pearson's method between the baseline  
808 (Day 0) frequencies T cell subsets and total GFP+ B lymphocytes at 3 dpi. Sorted by p value.

809 **Supplemental Figure 1:** Representative gating scheme for (A) B cell and (B) T cell  
810 immunophenotyping using lineage definitions as detailed in Table 2 (C) Full panel and FMO  
811 control for ICCS staining of IL-21 in the T cell immunophenotyping panel.

812 **Supplemental Figure 2:** (A) Total T cell subset frequencies in Mock and KSHV-infected cultures  
813 as in Figure 6. Correlograms of Pearson correlations between the distribution of KSHV infection  
814 within B cell subsets (y-axis) and (B) total IL-21 or the contribution of individual T cell subsets to  
815 IL-21 secretion at 3 dpi (x-axis), (C) baseline T cell frequencies, and (D) iMFI of IL-21 within T  
816 cell subsets at 3dpi. Pearson's r values with an absolute value greater than or equal to 0.53 are  
817 statistically significant for this dataset.

818 **Funding and Conflicts of Interest:** Funding for this study was provided to JT under grant  
819 numbers R01CA239590 and R01CA264913 by the National Cancer Institute/National Institutes  
820 of Health ([www.cancer.gov](http://www.cancer.gov)). The funders had no role in the study design, data collection and  
821 analysis, decision to publish, or in preparation of the manuscript. The authors have declared that  
822 no competing interests exist.

## 823 **References**

- 824 1. Chang, Y., et al., *Identification of herpesvirus-like DNA sequences in AIDS-associated*  
825 *Kaposi's sarcoma*. Science, 1994. **266**(5192): p. 1865-1869.
- 826 2. Ablashi, D.V., et al., *Spectrum of Kaposi's sarcoma-associated herpesvirus, or human*  
827 *herpesvirus 8, diseases*. Clinical microbiology reviews, 2002. **15**(3): p. 439-464.

- 828 3. Cesarman, E., et al., *Kaposi's sarcoma-associated herpesvirus-like DNA sequences in*  
829 *AIDS-related body-cavity-based lymphomas*. New England Journal of Medicine, 1995.  
830 **332**(18): p. 1186-1191.
- 831 4. Soulier, J., et al., *Kaposi's sarcoma-associated herpesvirus-like DNA sequences in*  
832 *multicentric Castleman's disease [see comments]*. Blood, 1995. **86**(4): p. 1276-1280.
- 833 5. Uldrick, T.S., et al., *An interleukin-6-related systemic inflammatory syndrome in patients*  
834 *co-infected with Kaposi sarcoma-associated herpesvirus and HIV but without*  
835 *Multicentric Castleman disease*. Clinical Infectious Diseases, 2010. **51**(3): p. 350-358.
- 836 6. Bouvard, V., et al., *A review of human carcinogens--Part B: biological agents*. The  
837 Lancet. Oncology, 2009. **10**(4): p. 321-322.
- 838 7. Parkin, D.M., *The global health burden of infection-associated cancers in the year 2002*.  
839 International journal of cancer, 2006. **118**(12): p. 3030-3044.
- 840 8. Ganem, D., *KSHV and the pathogenesis of Kaposi sarcoma: listening to human biology*  
841 *and medicine*. The Journal of clinical investigation, 2010. **120**(4): p. 939-949.
- 842 9. Casper, C., et al., *Frequent and asymptomatic oropharyngeal shedding of human*  
843 *herpesvirus 8 among immunocompetent men*. The Journal of infectious diseases, 2007.  
844 **195**(1): p. 30-36.
- 845 10. Aalam, F., et al., *Analysis of KSHV B lymphocyte lineage tropism in human tonsil reveals*  
846 *efficient infection of CD138+ plasma cells*. PLoS pathogens, 2020. **16**(10): p. e1008968.
- 847 11. Alomari, N. and J. Totonchy, *Cytokine-Targeted Therapeutics for KSHV-Associated*  
848 *Disease*. Viruses, 2020. **12**(10): p. 1097.
- 849 12. Parrish-Novak, J., et al., *Interleukin-21 and the IL-21 receptor: novel effectors of NK and*  
850 *T cell responses*. Journal of leukocyte biology, 2002. **72**(5): p. 856-863.
- 851 13. Parrish-Novak, J., et al., *Interleukin 21 and its receptor are involved in NK cell expansion*  
852 *and regulation of lymphocyte function*. Nature, 2000. **408**(6808): p. 57-63.
- 853 14. Kuchen, S., et al., *Essential role of IL-21 in B cell activation, expansion, and plasma cell*  
854 *generation during CD4+ T cell-B cell collaboration*. The journal of immunology, 2007.  
855 **179**(9): p. 5886-5896.
- 856 15. Konforte, D., N. Simard, and C.J. Paige, *IL-21: an executor of B cell fate*. The Journal of  
857 Immunology, 2009. **182**(4): p. 1781-1787.
- 858 16. Ozaki, K., et al., *Regulation of B cell differentiation and plasma cell generation by IL-21,*  
859 *a novel inducer of Blimp-1 and Bcl-6*. The Journal of Immunology, 2004. **173**(9): p.  
860 5361-5371.
- 861 17. Calame, K.L., K.-I. Lin, and C. Tunyaplin, *Regulatory mechanisms that determine the*  
862 *development and function of plasma cells*. Annual review of immunology, 2003. **21**(1): p.  
863 205-230.
- 864 18. Schmitz, I., et al., *IL-21 restricts virus-driven Treg cell expansion in chronic LCMV*  
865 *infection*. PLoS pathogens, 2013. **9**(5): p. e1003362.
- 866 19. Pallikkuth, S., et al., *Upregulation of IL-21 receptor on B cells and IL-21 secretion*  
867 *distinguishes novel 2009 H1N1 vaccine responders from nonresponders among HIV-*  
868 *infected persons on combination antiretroviral therapy*. The Journal of Immunology,  
869 2011. **186**(11): p. 6173-6181.
- 870 20. Collins, C.M. and S.H. Speck, *Interleukin 21 signaling in B cells is required for efficient*  
871 *establishment of murine gammaherpesvirus latency*. PLoS pathogens, 2015. **11**(4): p.  
872 e1004831.

- 873 21. Konforte, D. and C.J. Paige, *Identification of cellular intermediates and molecular*  
874 *pathways induced by IL-21 in human B cells*. The Journal of Immunology, 2006. **177**(12):  
875 p. 8381-8392.
- 876 22. Konforte, D., N. Simard, and C.J. Paige, *Interleukin-21 regulates expression of key*  
877 *Epstein–Barr virus oncoproteins, EBNA2 and LMP1, in infected human B cells*.  
878 *Virology*, 2008. **374**(1): p. 100-113.
- 879 23. Yajima, H., et al., *Loss of interleukin-21 leads to atrophic germinal centers in*  
880 *multicentric Castleman’s disease*. Annals of hematology, 2016. **95**(1): p. 35-40.
- 881 24. Gasperini, P. and G. Tosato, *Targeting the mammalian target of Rapamycin to inhibit*  
882 *VEGF and cytokines for the treatment of primary effusion lymphoma*. Leukemia, 2009.  
883 **23**(10): p. 1867-1874.
- 884 25. Gasperini, P., S. Sakakibara, and G. Tosato, *Contribution of viral and cellular cytokines*  
885 *to Kaposi’s sarcoma-associated herpesvirus pathogenesis*. Journal of leukocyte biology,  
886 2008. **84**(4): p. 994-1000.
- 887 26. Totonchy, J., et al., *KSHV induces immunoglobulin rearrangements in mature B*  
888 *lymphocytes*. PLoS pathogens, 2018. **14**(4): p. e1006967.
- 889 27. Darrah, P.A., et al., *Multifunctional TH1 cells define a correlate of vaccine-mediated*  
890 *protection against Leishmania major*. Nature medicine, 2007. **13**(7): p. 843-850.
- 891 28. Chang, J., et al., *Induction of Kaposi’s sarcoma-associated herpesvirus from latency by*  
892 *inflammatory cytokines*. Virology, 2000. **266**: p. 17-25.
- 893 29. Chang, J., et al., *Inflammatory cytokines and the reactivation of Kaposi’s sarcoma-*  
894 *associated herpesvirus lytic replication*. Virology, 2000. **266**(1): p. 17-25.
- 895 30. Gantt, S., et al., *Prospective characterization of the risk factors for transmission and*  
896 *symptoms of primary human herpesvirus infections among Ugandan infants*. The Journal  
897 of infectious diseases, 2016. **214**(1): p. 36-44.
- 898 31. Jondle, C., et al., *Gammaherpesvirus Usurps Host IL-17 Signaling To Support the*  
899 *Establishment of Chronic Infection*. Mbio, 2021. **12**(2): p. e00566-21.
- 900 32. Jondle, C., et al., *T Cell-Intrinsic Interferon Regulatory Factor 1 Expression Suppresses*  
901 *Differentiation of CD4+ T Cell Populations That Support Chronic Gammaherpesvirus*  
902 *Infection*. Journal of Virology, 2021. **95**(20): p. e00726-21.
- 903 33. Gaddi, P.J. and G.S. Yap, *Cytokine regulation of immunopathology in toxoplasmosis*.  
904 *Immunology and cell biology*, 2007. **85**(2): p. 155-159.
- 905 34. Kelly, M.N., et al., *Interleukin-17/interleukin-17 receptor-mediated signaling is*  
906 *important for generation of an optimal polymorphonuclear response against Toxoplasma*  
907 *gondii infection*. Infection and immunity, 2005. **73**(1): p. 617-621.
- 908 35. Shainheit, M.G., et al., *The pathogenic Th17 cell response to major schistosome egg*  
909 *antigen is sequentially dependent on IL-23 and IL-1 $\beta$* . The Journal of Immunology, 2011.  
910 **187**(10): p. 5328-5335.
- 911 36. Wen, X., et al., *Dynamics of Th17 cells and their role in Schistosoma japonicum infection*  
912 *in C57BL/6 mice*. PLoS neglected tropical diseases, 2011. **5**(11): p. e1399.
- 913 37. Wakeham, K., et al., *Parasite infection is associated with Kaposi’s sarcoma associated*  
914 *herpesvirus (KSHV) in Ugandan women*. Infectious agents and cancer, 2011. **6**(1): p. 1-7.
- 915 38. Totonchy, J., *Extrafollicular activities: perspectives on HIV infection, germinal center-*  
916 *independent maturation pathways, and KSHV-mediated lymphoproliferation*. Current  
917 opinion in virology, 2017. **26**: p. 69-73.



- 918 39. Quigley, M.F., et al., *CXCR5+ CCR7-CD8 T cells are early effector memory cells that*  
919 *infiltrate tonsil B cell follicles*. *European journal of immunology*, 2007. **37**(12): p. 3352-  
920 3362.
- 921 40. Yang, R., et al., *IL-6 promotes the differentiation of a subset of naive CD8+ T cells into*  
922 *IL-21-producing B helper CD8+ T cells*. *Journal of Experimental Medicine*, 2016.  
923 **213**(11): p. 2281-2291.
- 924 41. Wickham, H., *Ggplot2 : elegant graphics for data analysis*. Use R! 2009, New York:  
925 Springer. viii, 212 p.
- 926 42. Kassambara, A., *ggcorrplot: Visualization of a Correlation Matrix using 'ggplot2'*. 2019.
- 927 43. Schloerke, B., J. Crowley, and D. Cook, *Package 'GGally'*. Extension to 'ggplot2.' See,  
928 2018. **713**.
- 929 44. Lander, J.P., *R for everyone : advanced analytics and graphics*. Second edition ed. The  
930 Addison Wesley data and analytics series. 2017, Boston: Addison-Wesley. xxiv, 528  
931 pages.
- 932 45. Kassambara, A., *rstatix: Pipe-Friendly Framework for Basic Statistical Tests*. 2020.  
933
-

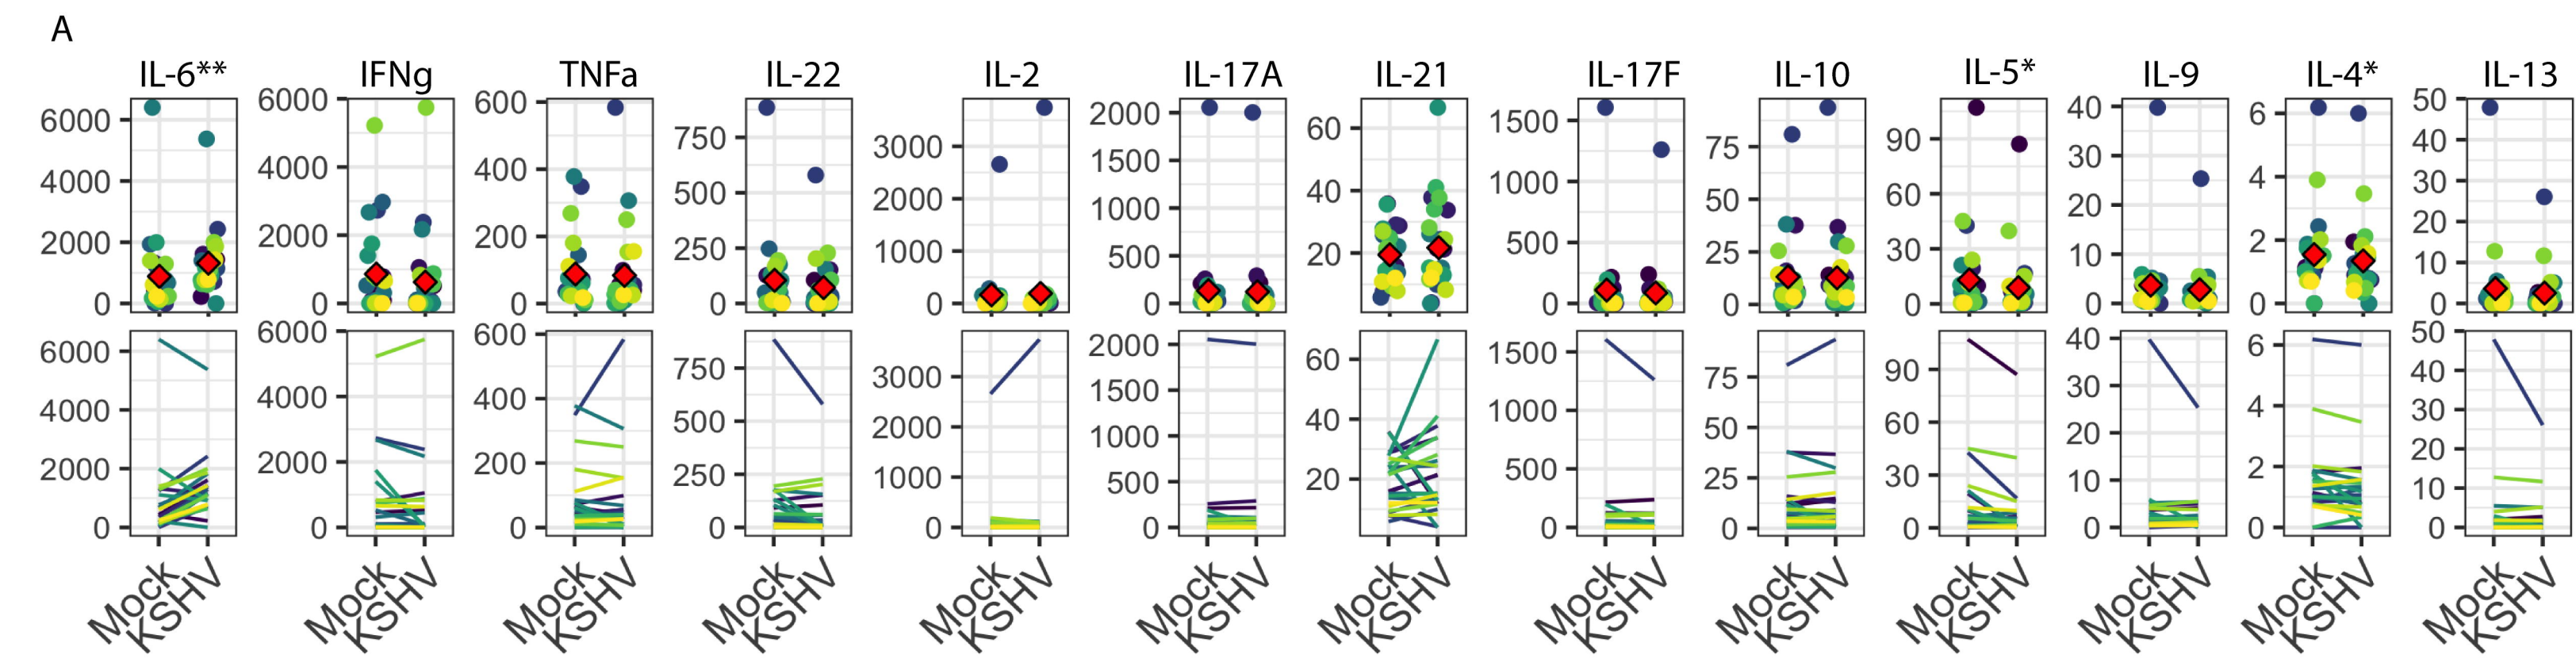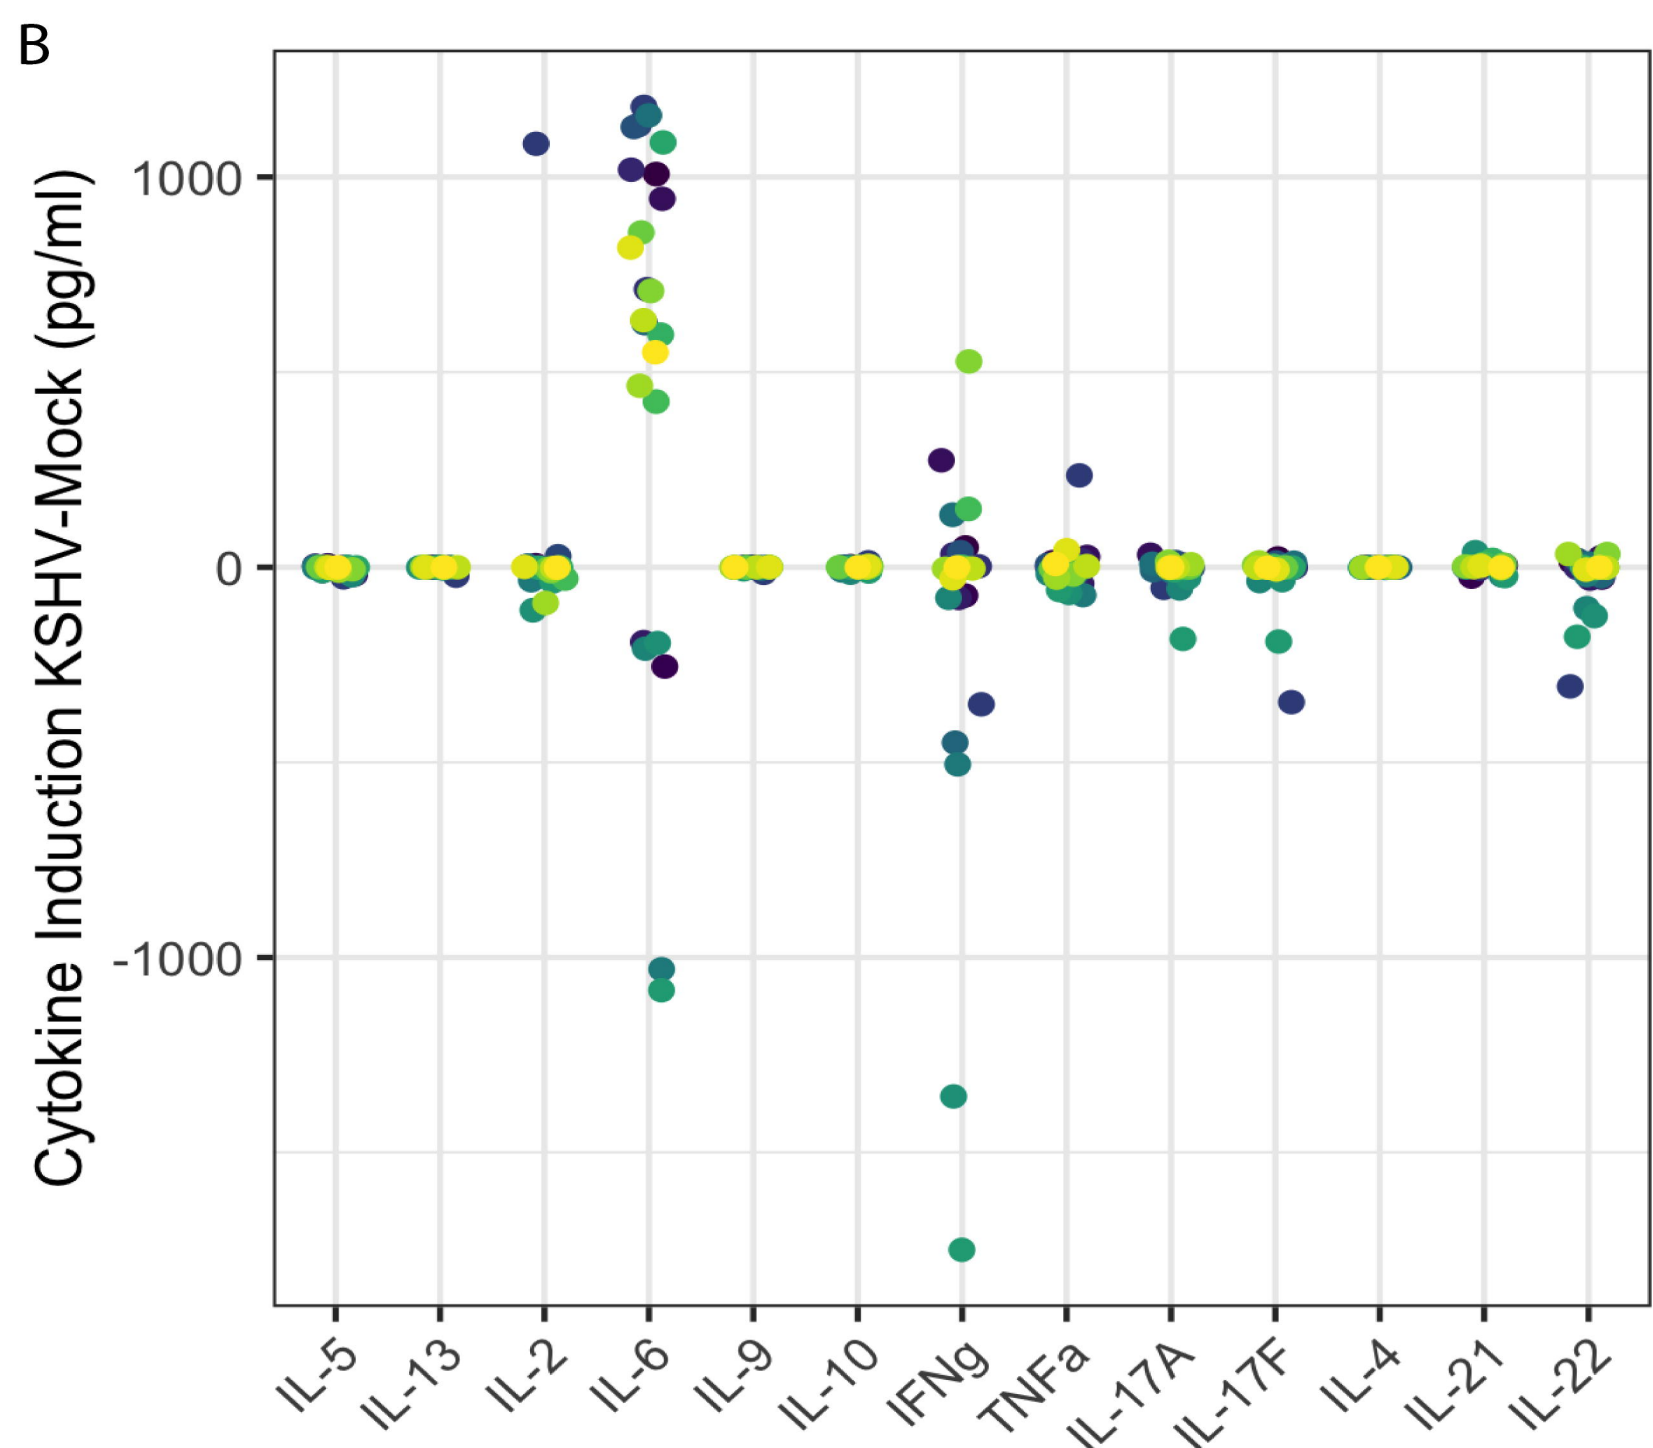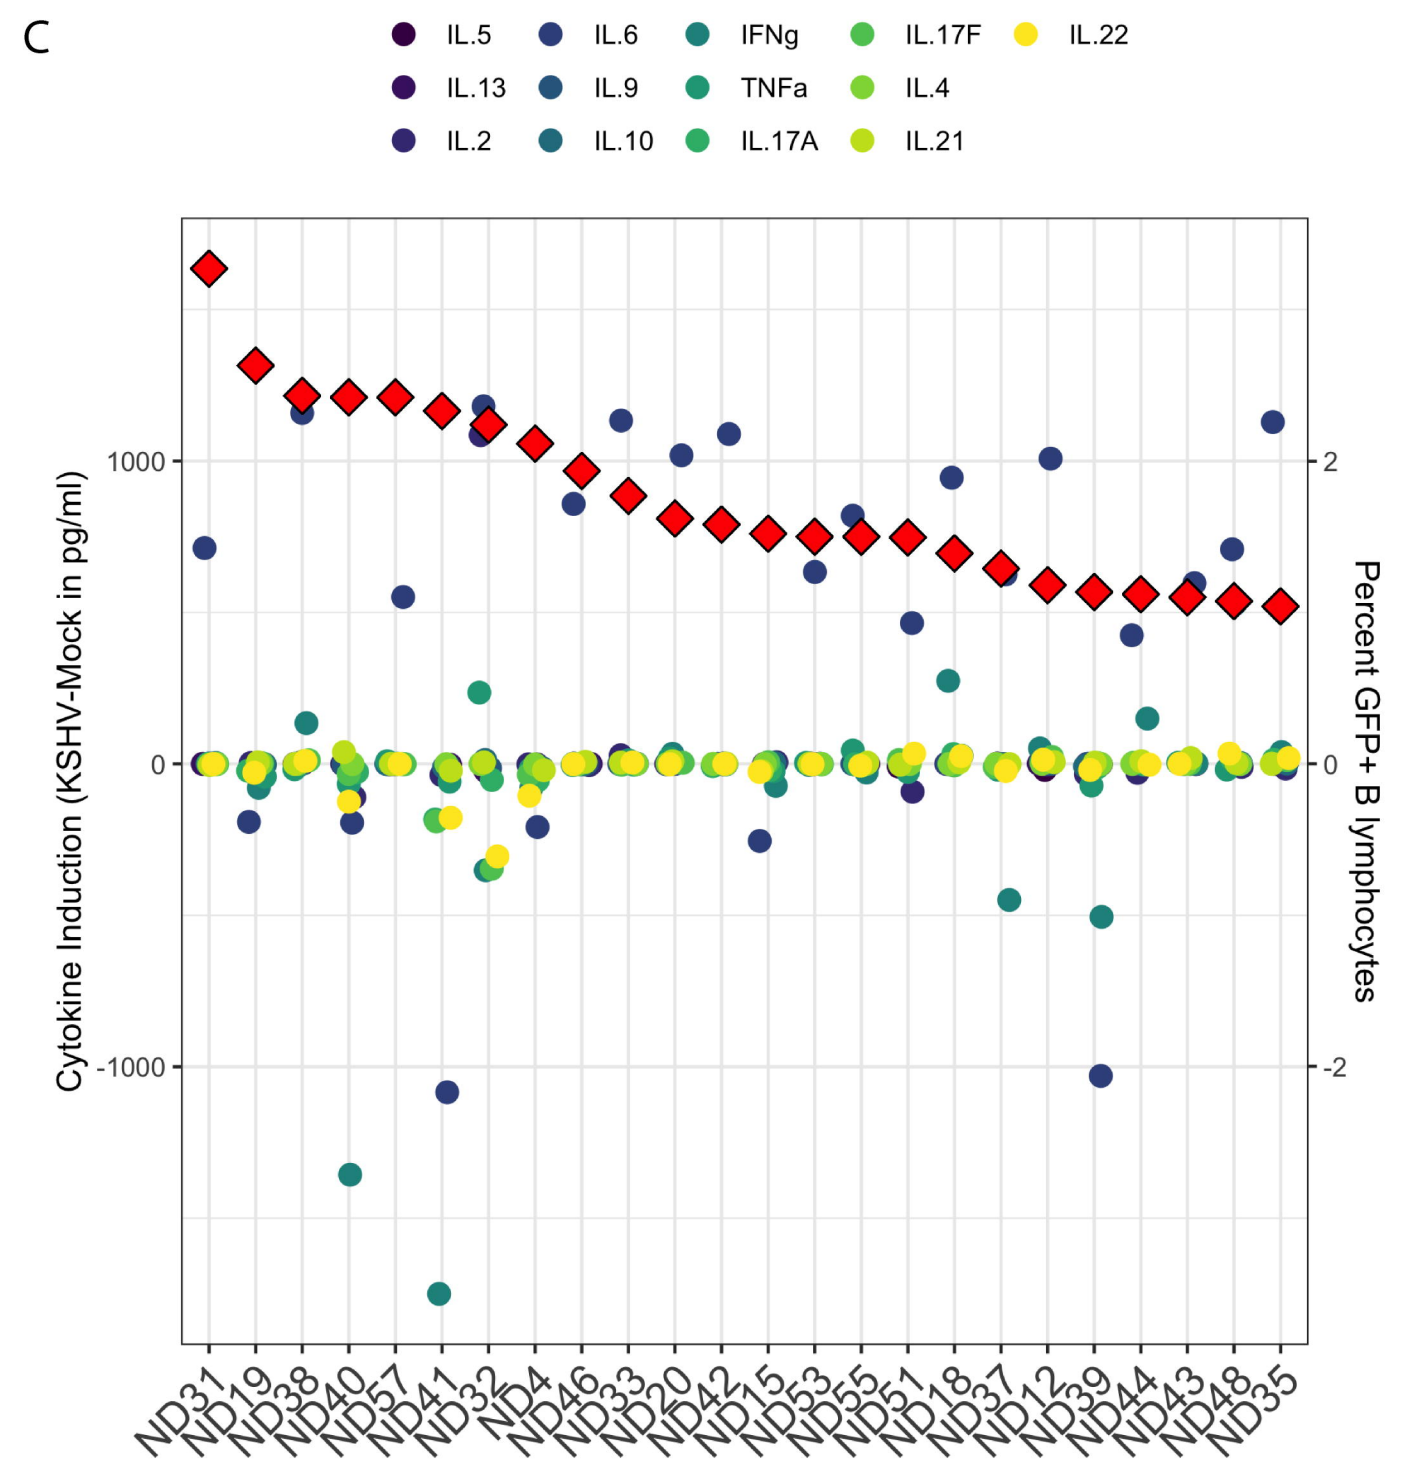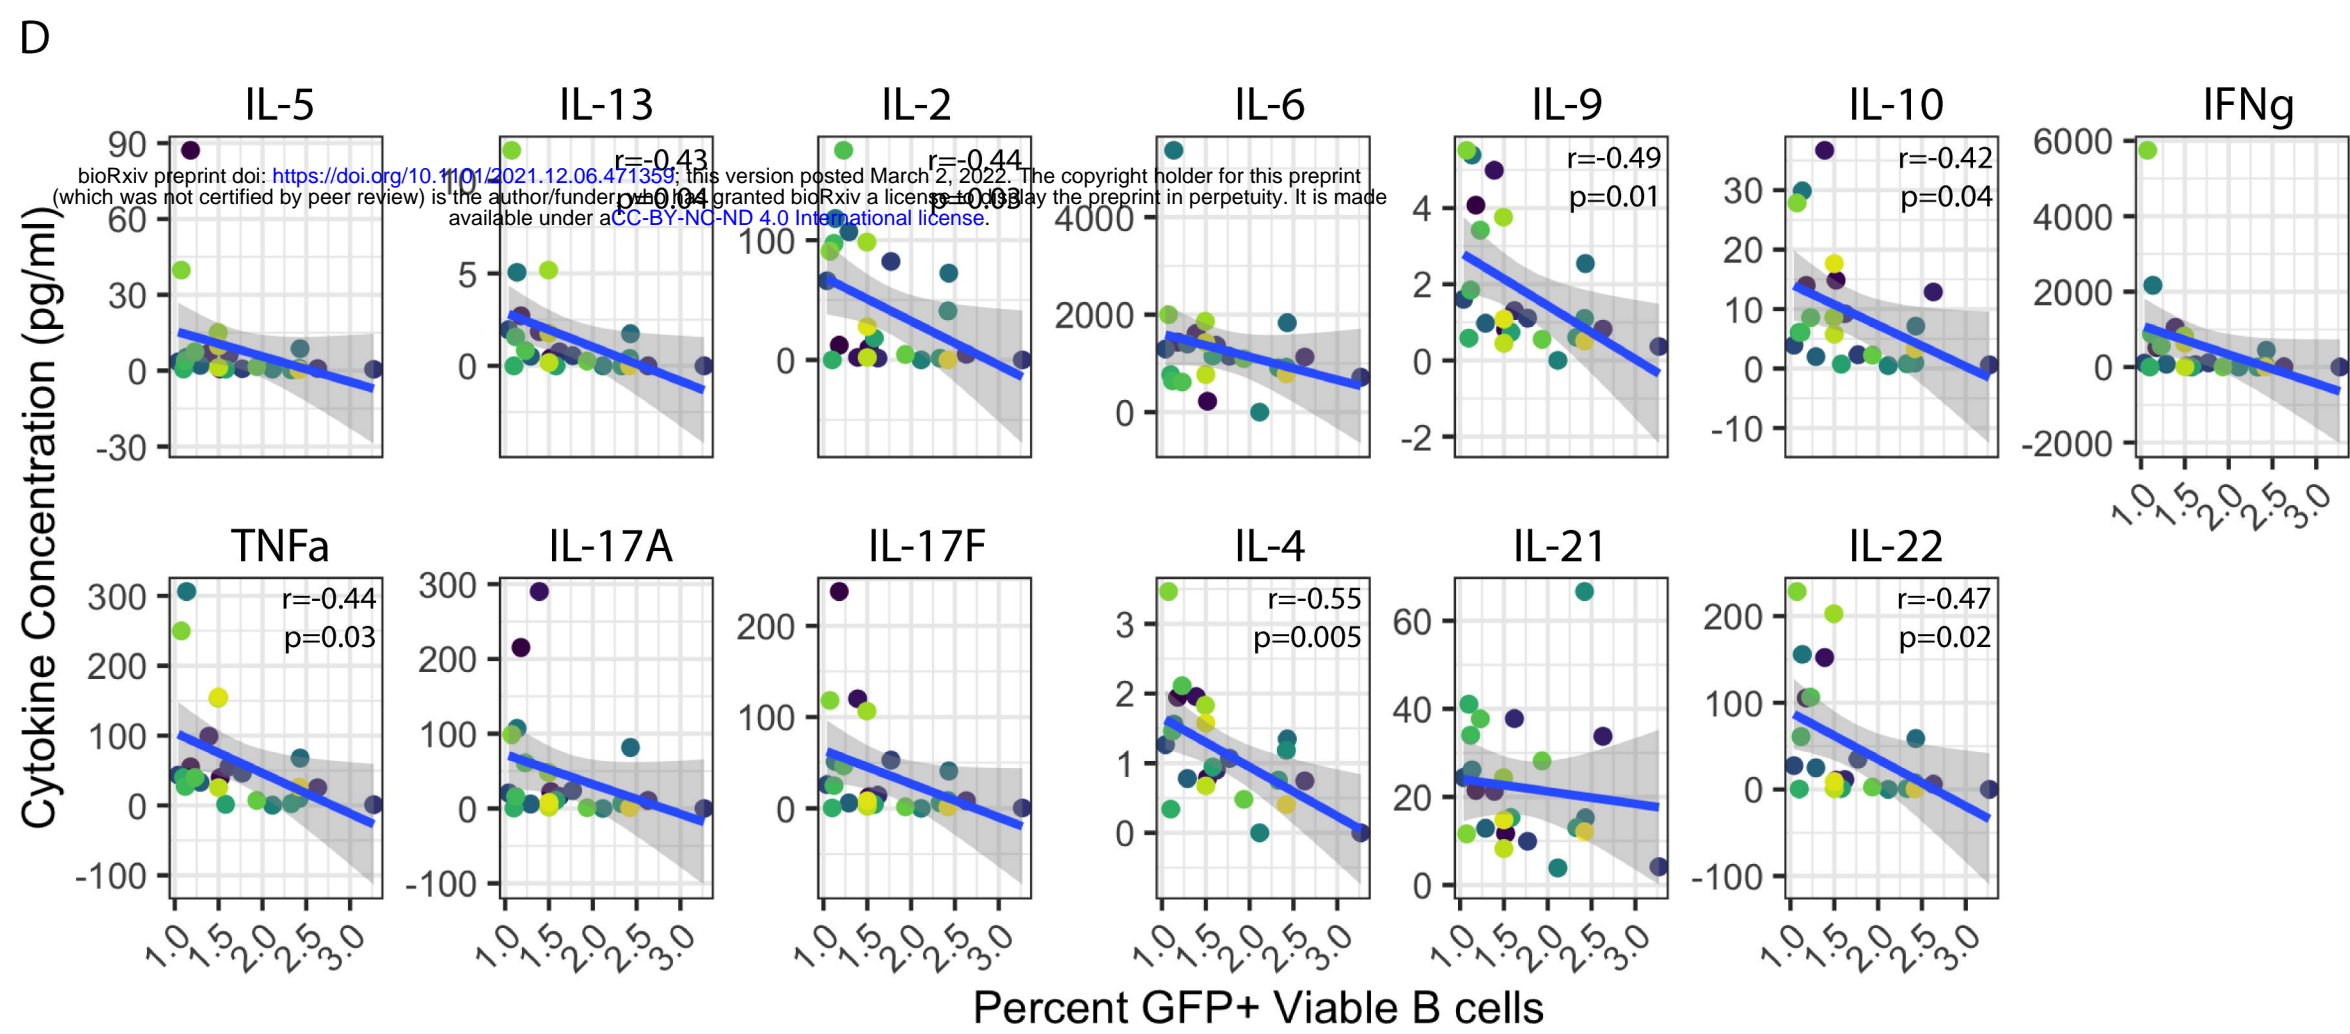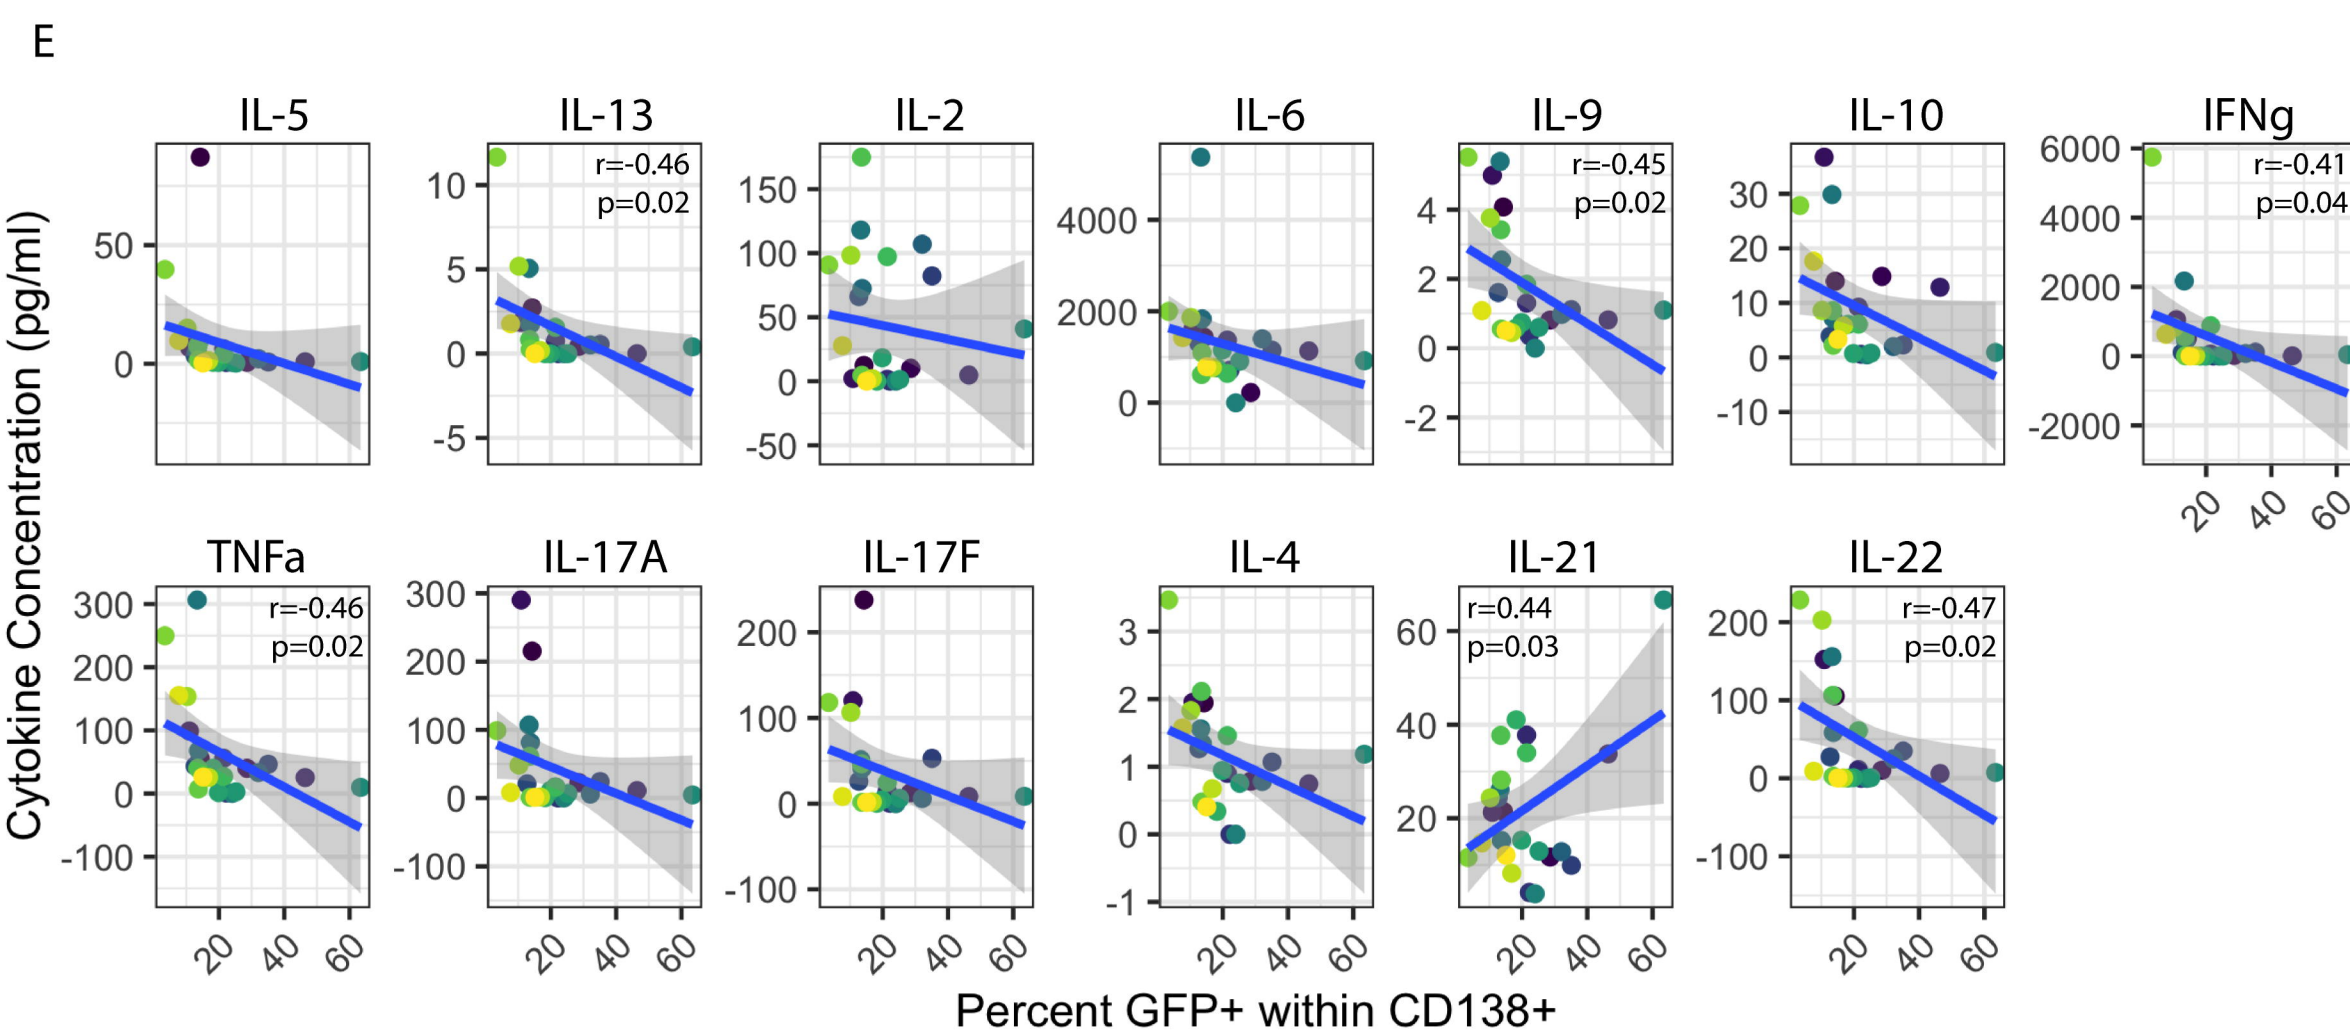

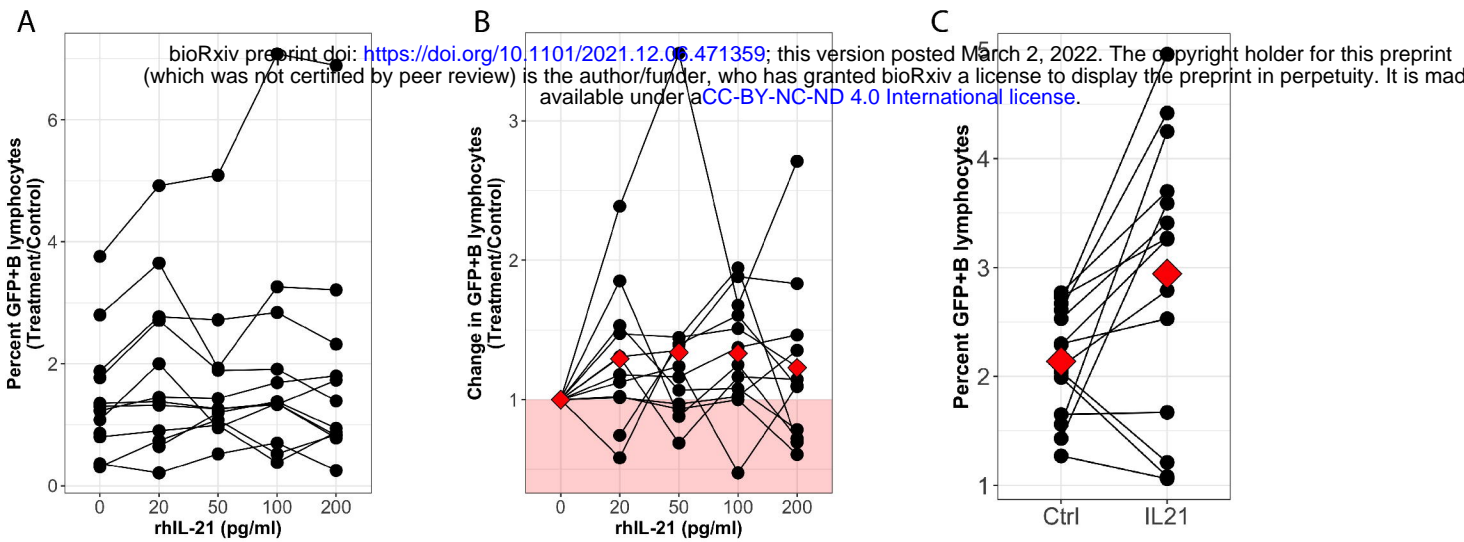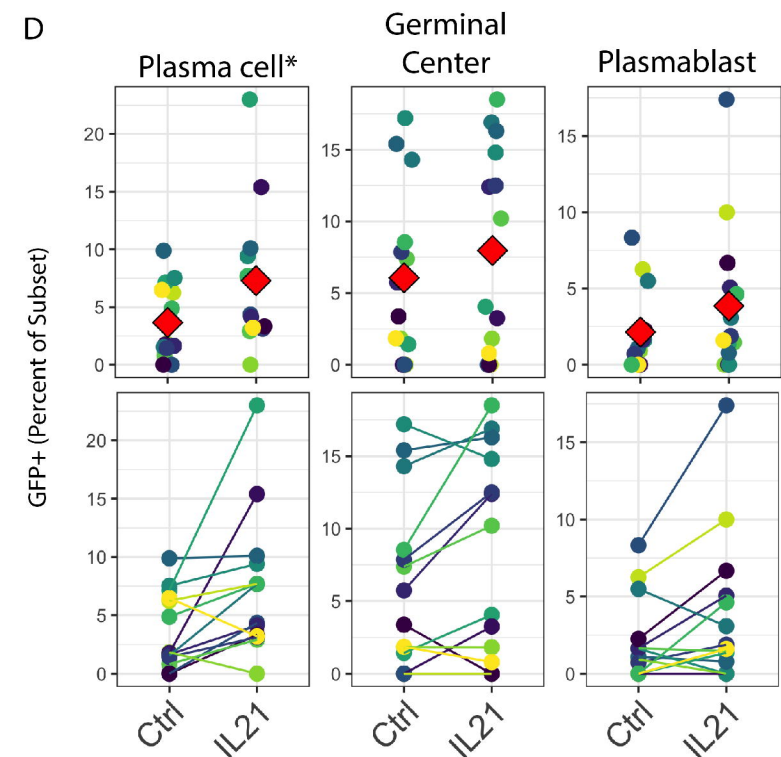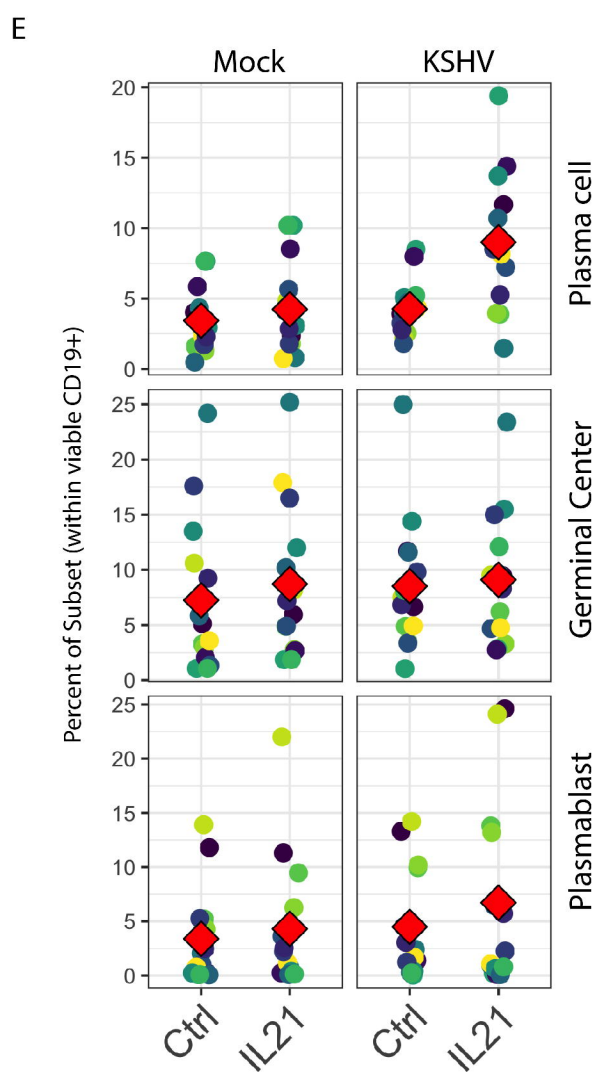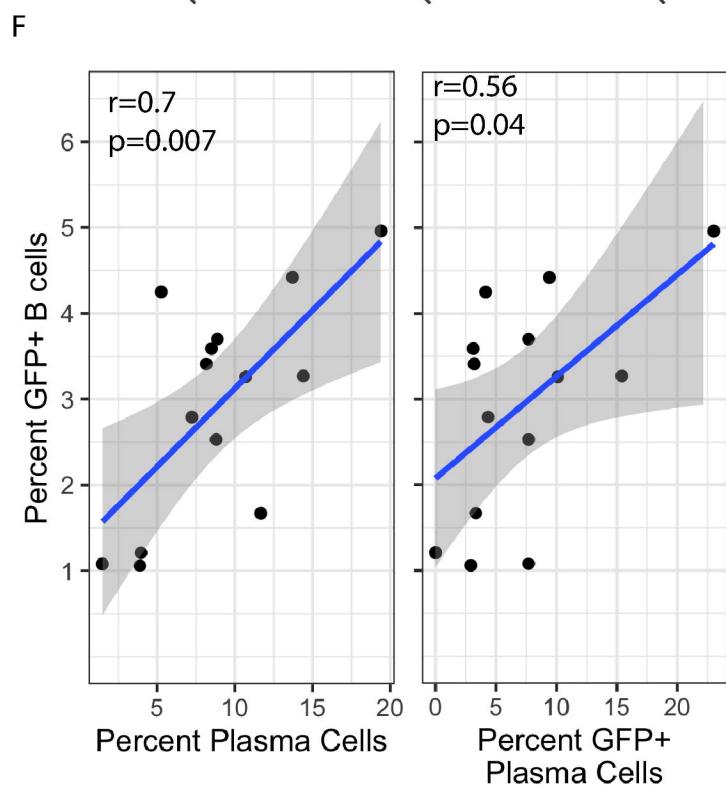

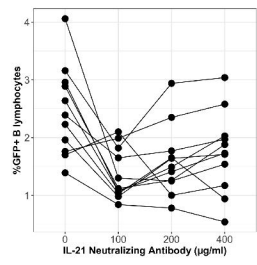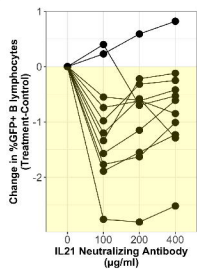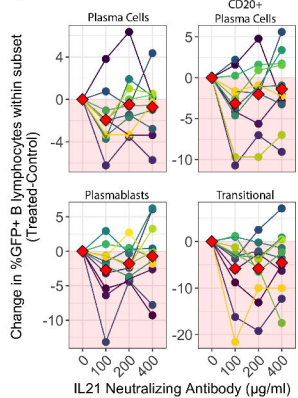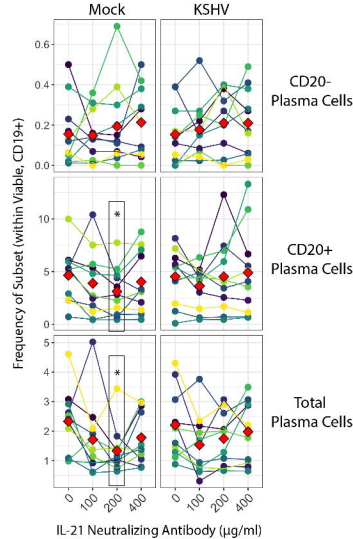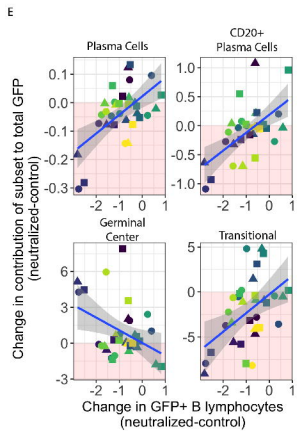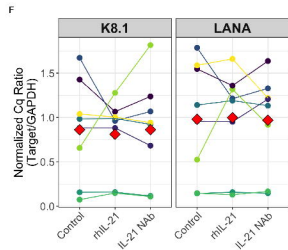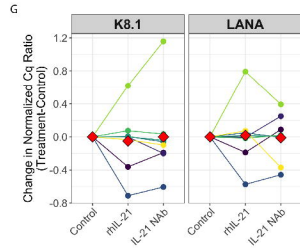

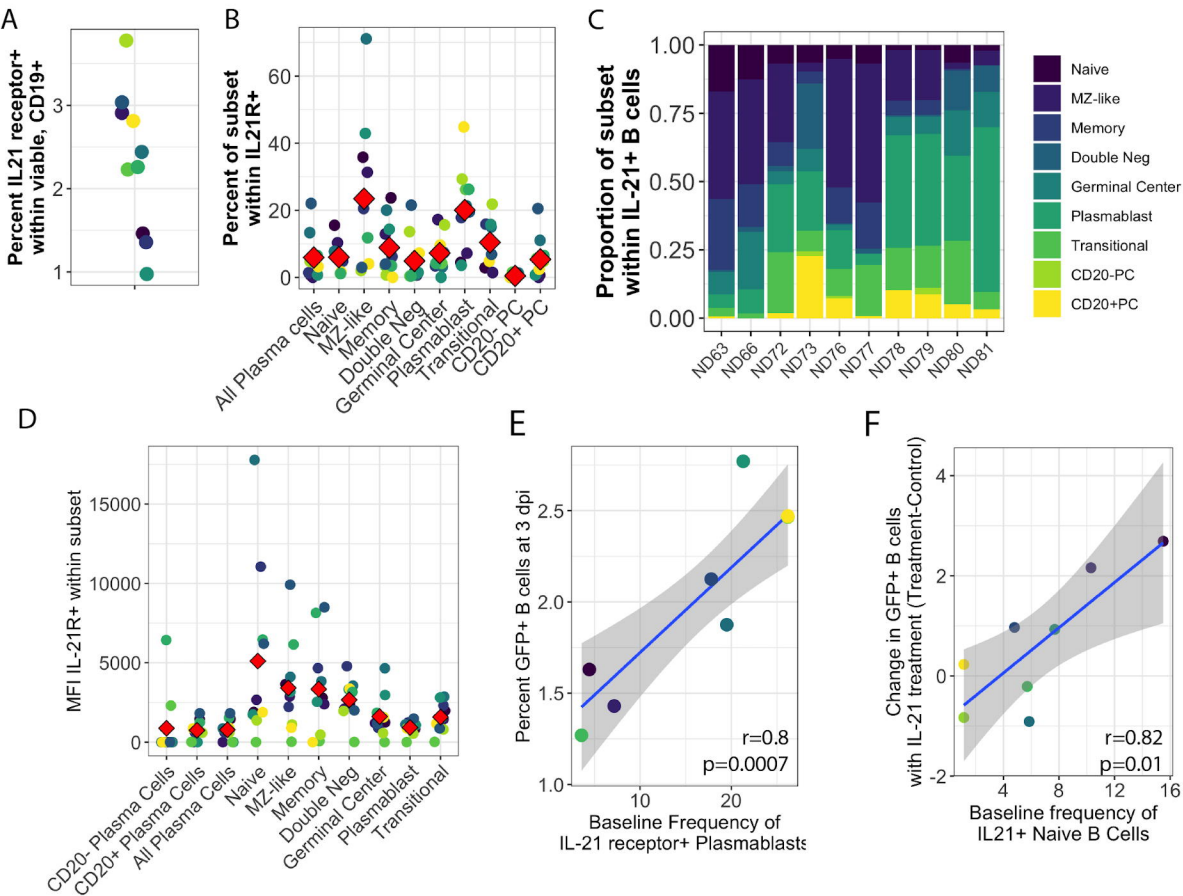

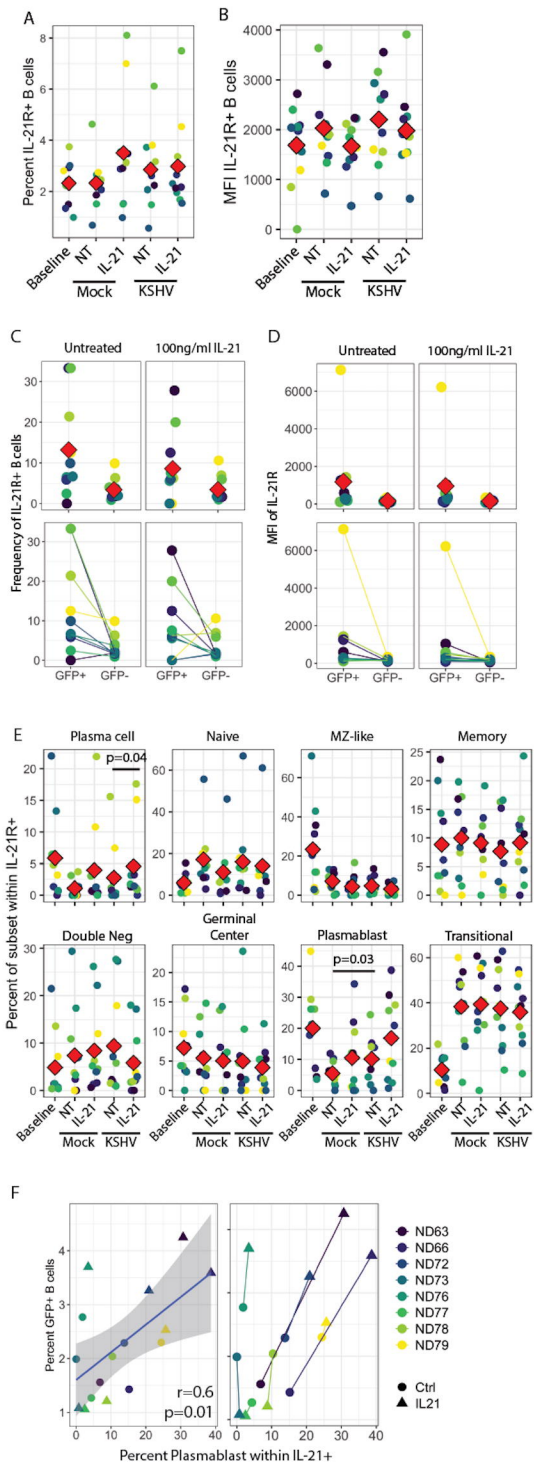

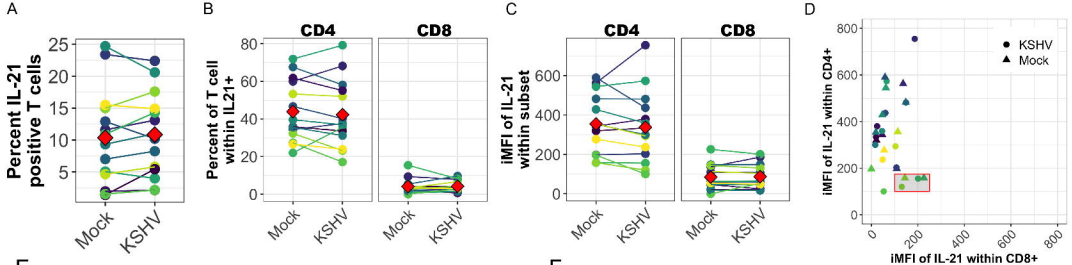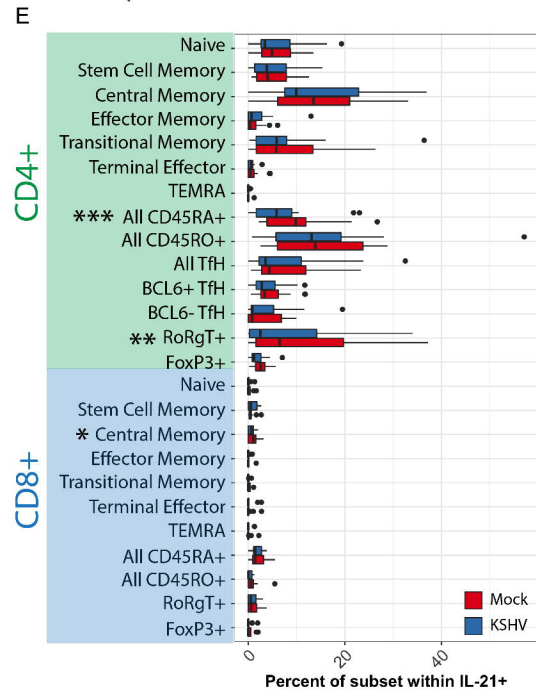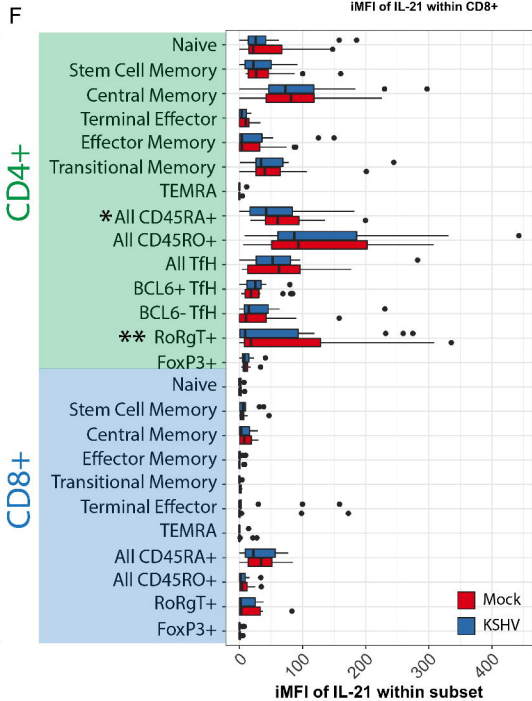

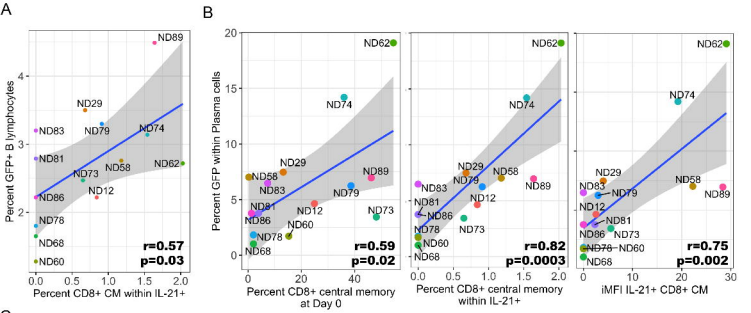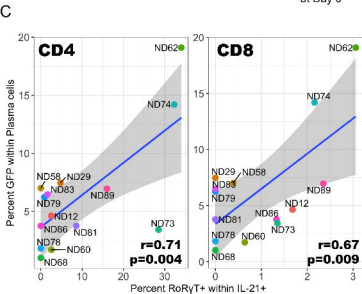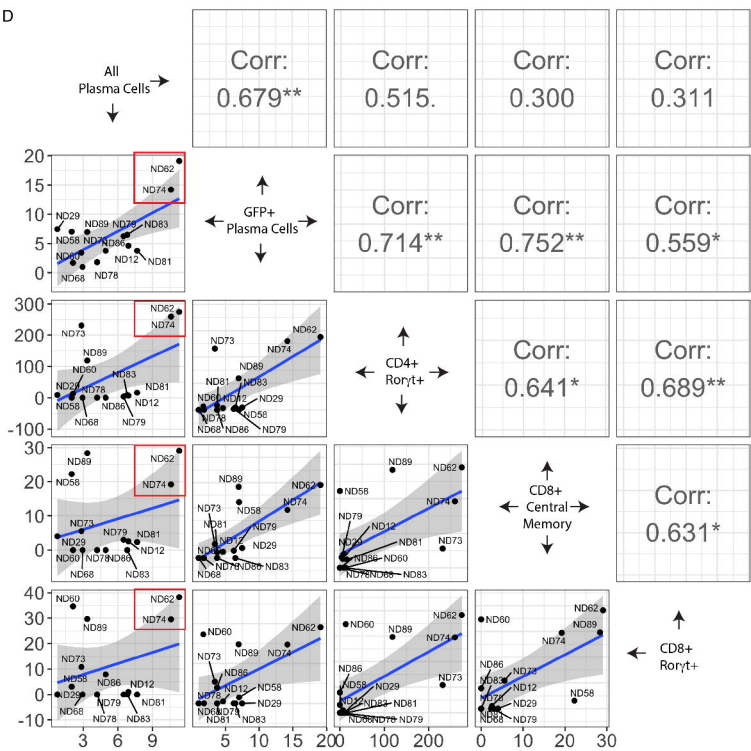



A

## Baseline Frequency

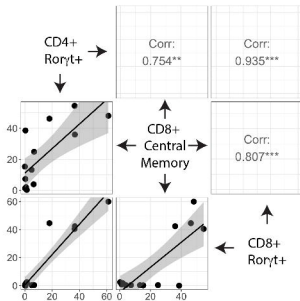

## 3dpi Frequency

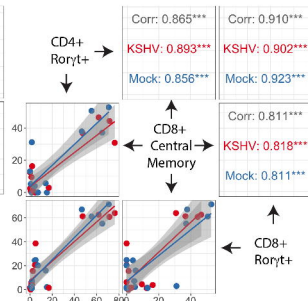

B

## Frequency within IL-21+

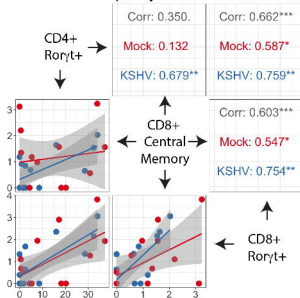

## iMFI of IL-21

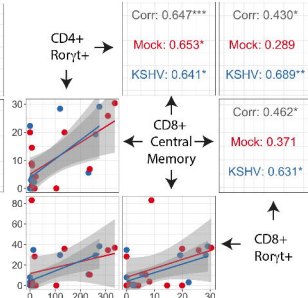

C

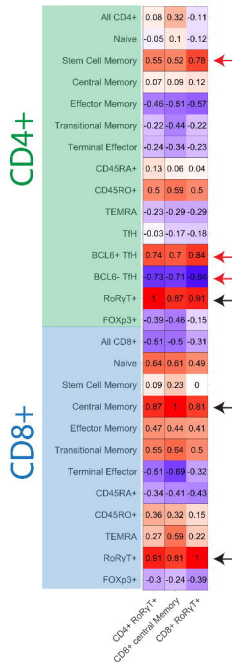

Source: https://www.biorxiv.org/content/10.1101/2021.12.06.471359.full.pdf
